# Supplementary material for: Spatio-temporal evolution of supply-demand-support system coupling coordination and its influencing factors of Chinese cultural tourism
Source: Research Square preprint supplement (doi:10.21203/rs.3.rs-5804432/v1), 2025-01-23
Supplement: Supplementary file 1 [file 70e275ce064d9082c9722796.xlsx]

## Sheet: 基础数据
地区	年份	X11	X12	X13	X14	X15	X16	X21	X22	X23	X24	X25	X26	X27	X28	X44	X51	X52	X53	X54	X55	X61	X62	X63	X64	X71	X72	X73	X74	X75	X76
北 京	2010	1.7021	644	905	18	41	20	18390.1	490.07	197.357	499.5	429.6	2425.1	50.4461	93.0253	18959.6	1200	21114	5630	1227.34	3.54	7	587106	2	161.693	2137	0.245327	1797.02	0.442747	0.139806	0.562339
天 津	2010	0.534032	99	310	36	18	19	6117.5	166.07	131.208	400.7	318.3	1151.9	14.1951	87.4837	5813.44	800	14832	396	433.296	2.01	4	429224	1	56.348	391	0.150039	699.091	0.0634671	0.256213	0.344406
河 北	2010	1.13904	198	1148	284	65	177	14851	97.74	238.448	1246	4948.2	890.84	3.5071	191.407	10969.2	4900	154344	156.8	1351.63	4.22	0	1105118	12	70.307	358	0.136541	78	0.0224887	0.164549	0.115923
山 西	2010	0.913684	255	755	342	89	131	12497	130.29	415.68	1081.5	5755	1052.26	4.646	143.729	7353.95	3800	131644	642.99	735.926	3.32	1	562924	16	78	490	0.136035	93.6	0.0280573	0.328634	0.343541
内蒙古	2010	0.656324	239	677	123	54	116	4477.55	142.8	305.057	583.9	1623.2	692.92	6.019	202.785	4699.43	8900	157994	377	601.37	4.73	0	371388	9	112.982	454	0.122677	7.52727	0.0200605	0.192168	0.180073
辽 宁	2010	1.26168	432	1145	239	61	122	28278	361.8	313.752	1033.6	811	2533.4	22.5933	280.969	7801.45	4300	101545	754	1171.63	2.99	5	880247	11	113.43	666	0.163317	162.2	0.045434	0.282095	0.328203
吉 林	2010	0.878542	207	521	68	57	77	6408.89	82.01	243.646	507.8	885.9	712.39	3.0492	218.908	4134.5	4000	90437	296	613.173	4.53	0	544392	7	90.327	209	0.118129	43.2222	0.0187324	0.100655	0.238326
黑龙江	2010	0.796647	246	601	89	76	146	15702	172.42	261.741	716.3	818.4	832	7.625	163.901	4145.38	5800	151945	851	745.583	6.56	2	719117	2	74.631	237	0.117209	18.7826	0.0363979	0.338509	0.255865
上 海	2010	0.730115	291	867	89	27	27	22432	733.72	292.256	624.6	1036.7	2522.9	63.4092	1692.3	10935.6	400	11974	3642	1275.24	2.62	4	515661	2	186.266	1279	0.381929	2389.66	0.343697	2.2639	0.683268
江 苏	2010	3.2762	702	1805	408	213	118	35518.6	653.55	325.279	4556.8	3940.6	4287.86	47.8343	741.586	13461.3	1900	150307	476	2328.76	3.75	8	1649430	10	163.123	1555	0.205529	440.6	0.101925	0.160002	0.408403
浙 江	2010	2.77499	814	1639	471	100	101	29500	684.71	560.909	1957.2	10573.3	3046	39.302	808.362	13152.4	1800	110177	1520	2101.84	4.01	13	884867	7	242.002	1003	0.223278	286.7	0.125484	0.133004	0.456093
安 徽	2010	1.85737	417	904	1255	120	120	15349	198.42	227.794	1205.4	10786.4	1094.8	7.0898	440.367	7989.04	2900	149382	208	887.547	2.55	0	938954	11	76.813	593	0.127731	121.769	0.047918	0.0975442	0.193037
福 建	2010	0.869283	374	718	449	94	95	11957	368.14	204.667	1600.2	4100.2	1202.25	29.7824	508.046	11219.3	2100	91015	1356.1	1214.39	2.64	5	647774	10	101.855	552	0.18071	145.25	0.10573	0.162606	0.262972
江 西	2010	0.853264	311	699	99	108	115	10705	113.97	257.73	2073	1584.9	794.8	3.4603	291.418	6161.45	2800	140597	186	692.005	2.17	1	816484	14	73.401	353	0.111259	46.125	0.0261823	0.141523	0.235495
山 东	2010	2.37658	895	1842	119	114	158	34990	366.79	599.428	1384.4	2538.2	2915.8	21.5504	444.275	14106.6	3800	229859	1175.89	1960.68	2.05	4	1631373	7	138.876	3133	0.165396	459.667	0.0577187	0.141791	0.262135
河 南	2010	1.5302	386	1096	371	111	202	25845	146.84	386.485	1794.2	8405.8	2294	4.9877	305.281	11445.3	4300	245089	1489	1473.45	3.32	1	1456730	20	95.143	1373	0.107083	275.938	0.0488012	0.155432	0.305204
湖 北	2010	1.41218	455	931	204	120	113	20946	181.74	451.093	1905.1	3892.3	1409.48	7.5116	354.529	11669	3400	206211	885.4	1039.03	2.91	1	1296920	11	114.389	882	0.120816	126.889	0.0636253	0.204592	0.251781
湖 南	2010	1.06177	433	681	201	81	140	20208.2	189.87	488.378	2199.9	2173.6	1365.54	9.0622	549.406	10121.8	3700	227998	606	1057.99	2.35	1	1047241	2	86.133	534	0.156396	84.9048	0.137149	0.130419	0.274694
广 东	2010	1.42188	1008	1247	397	169	144	18142	3140.93	897.296	2582.5	5608.9	2964.59	123.826	1094.5	15426.3	2700	190144	7628	4553.38	2.06	9	1426624	8	269.94	2292	0.245984	256.278	0.280636	0.0466588	0.375311
广 西	2010	1.19941	379	428	141	64	122	14074	250.24	415.523	744.1	1507.6	898.1	8.0615	261.079	8544.71	3200	101782	1201	821.894	1.76	1	567516	10	80.097	192	0.121309	33.087	0.0787871	0.189096	0.211218
海 南	2010	0.499534	186	299	67	16	21	2521.03	66.33	67.5418	98.5	682.5	235.61	3.2236	83.5934	4350.22	700	21236	1489	224.664	1.73	0	150806	1	27.356	101	0.246504	85.5882	0.0958634	0.0585255	0.233361
重 庆	2010	0.841272	246	379	381	37	41	16036.6	137.02	380.737	1550.9	2096.8	868.36	7.032	195.756	4294.56	1400	116949	739	581.296	1.55	3	522719	1	77.35	554	0.1838	151.154	0.145678	0.128295	0.226736
四 川	2010	1.53083	395	730	348	108	204	27141.3	104.93	611.286	3357.1	3303.9	1862.03	3.5409	642.574	11147.4	3500	266082	2182	1450.69	2.93	4	1086215	4	143.902	878	0.143069	38.8958	0.0477298	0.112649	0.244996
贵 州	2010	0.605563	324	261	52	59	95	12863	50.01	290.03	1177.1	567.7	1052.64	1.2958	148.964	5754.55	2000	151644	637.59	512.472	2.21	0	323293	4	53.676	134	0.0877308	29.0588	0.0427901	0.182338	0.55919
云 南	2010	1.09072	560	531	142	120	148	13836.8	329.15	692.656	1529.1	1740.7	916.82	13.2365	178.062	5933.9	2500	209231	753.75	773.038	2.26	0	439042	13	86.881	180	0.119724	24.8684	0.127946	0.359483	0.285245
西 藏	2010	0.0778777	105	78	37	2	82	662	22.83	30.2925	14.9	380.3	64.4001	1.0359	27.0231	709.26	500	60810	154.04	64.3427	4.16	0	31109	1	21.05	6	0.09792	0.383333	0.0351875	0.0838732	0.234306
陕 西	2010	1.08172	269	596	127	106	120	14354	212.17	223.593	1498.1	3093.4	916	10.1596	252.704	10235.7	4100	147461	783	857.237	3.13	4	927769	13	89.457	678	0.137894	61.1579	0.0588766	0.156338	0.202578
甘 肃	2010	0.908563	311	352	82	102	102	4284.45	7.02	136.813	646.7	2299.2	236.21	0.1481	101.408	3943.44	2400	118879	100	423.151	2.17	0	381526	1	55.563	206	0.0995404	11.2821	0.0377358	0.0798105	0.15944
青 海	2010	0.207235	105	197	32	18	51	1221.5	4.67	42.5569	83.2	226	70	0.2045	29.2594	1070.3	1900	62185	85	114.302	4.65	0	44994	1	41.114	34	0.0972518	1.34722	0.0171505	0.111973	0.149411
宁 夏	2010	0.463083	57	86	45	6	26	1018.8	1.8	99.3494	74	597.5	67.3	0.0599	49.0283	2474.59	1200	22518	141.2	135.196	4.18	0	80206	2	24.483	88	0.1087	31.3636	0.059744	0.0752659	0.0991456
新 疆	2010	1.58831	436	356	132	71	111	3038	50.94	298.737	366.4	1052.4	281.13	1.8542	114.533	3034.08	4200	152843	490	555.952	3.23	0	251160	2	71.273	53	0.139956	2.8875	0.0296649	0.0967212	0.181222
北 京	2011	1.9251	565	1032	118	41	19	21404.4	520.4	197.19	533.27	723.22	2864.3	54.16	166.296	20011	1200	21347	6100	566.451	3.36	1	587887	2	179.115	2091	0.289256	1708.33	0.381802	0.156922	0.629251
天 津	2011	0.547106	100	332	53	19	18	10605.4	73.06	131.17	405.89	286.64	1384.7	17.5553	273.837	6031	900	15163	475	176.289	2	3	449702	1	74.595	414	0.173059	788.182	0.0732116	0.428274	0.359233
河 北	2011	2.00184	395	1156	312	69	163	18627	114.14	238.92	1446.93	3379.35	1192.21	4.4765	210.452	11635	5200	156965	229.6	539.616	4.23	0	1149252	12	93.048	411	0.166667	88.5789	0.0267095	0.188432	0.146527
山 西	2011	1.11655	301	762	308	89	119	14975	155.32	415.34	1102.65	4283.01	1305.1	5.6719	171.433	7904	3800	134808	735	305.618	3.14	0	594469	17	111.854	498	0.16075	102.2	0.0342878	0.3859	0.388785
内蒙古	2011	1.0353	227	696	121	59	103	5177.95	151.52	305.19	609.78	1471.74	847.28	6.7097	242.752	5137	9200	160995	457	245.065	5.11	0	384440	9	127.692	430	0.14247	8.48182	0.027696	0.204872	0.182877
辽 宁	2011	1.49713	409	1116	200	62	99	32564	405.33	314	896.2	461.69	3159.3	27.1314	252.246	8557	4300	104026	750	472.645	2.67	0	902231	12	109.256	684	0.187097	175	0.0534104	0.334355	0.343088
吉 林	2011	1.06304	198	500	67	58	63	7541.98	99.32	243.59	741.9	893.6	904.29	3.8528	167.021	4560	4000	91754	311	238.605	3.91	1	562831	10	93.047	163	0.1505	47.2222	0.0202818	0.112058	0.300336
黑龙江	2011	1.02127	244	629	88	103	131	20237	206.52	261.94	1217.37	828.47	1032	9.1762	171.161	4490	5900	155592	923	307.772	5.33	0	709968	3	87.957	251	0.130769	20.3696	0.0305101	0.404977	0.30083
上 海	2011	0.935297	277	1010	102	36	26	23079.2	668.61	292.16	783.34	1042.42	2786.5	57.5118	2140.17	11663	500	12084	3766	563.422	2.46	11	511283	2	241.757	1519	0.301389	2808.62	0.372414	2.36692	0.758541
江 苏	2011	3.2886	723	1891	370	245	103	41150	737.33	325.94	5211.73	3107.83	5161.47	56.5297	896.459	14648	2400	152247	555	986.545	3.79	17	1659415	11	228.144	1719	0.227447	486.5	0.117939	0.169684	0.412478
浙 江	2011	3.01545	844	1760	498	100	92	34295	773.69	561.76	2216.12	5091.45	3785	45.4173	1070.2	14267	1800	111776	1580	901.291	4.2	31	907482	7	288.595	1186	0.238871	332.4	0.134609	0.151964	0.460224
安 徽	2011	2.25691	390	969	1294	131	106	22534.8	262.87	228.36	2571.23	11821.1	1815	11.7918	437.12	8896	3100	149535	214	369.188	2.45	0	991267	11	91.387	729	0.146405	169.308	0.0553784	0.122849	0.305784
福 建	2011	1.28538	377	702	454	95	85	14230	427.42	204.76	1600.39	5120.85	1399.77	36.3444	638.453	11804	2100	92322	1531.65	510.827	2.83	5	674779	10	107.639	630	0.198515	184.167	0.154853	0.184255	0.266728
江 西	2011	1.07115	336	709	99	108	103	15854	135.83	258.1	1847.63	2001.91	1079	4.15	340.251	6717	2800	146632	208	279.195	2.35	2	828599	14	69.643	251	0.131183	54.75	0.0602687	0.202582	0.30341
山 东	2011	3.05411	869	1865	252	120	142	41696	424.23	600.27	1594.59	2519	3573.7	25.5076	460.193	15330	4200	233190	1308	809.023	2.03	15	1645589	7	175.411	2451	0.195634	453.933	0.0698837	0.167685	0.275884
河 南	2011	2.39001	343	1098	468	159	185	30599	168.29	387.08	2696.16	7420.58	2766	5.4903	379.633	12518	4300	247587	1697	603.669	3.33	1	1500142	21	122.44	1410	0.128332	265.5	0.0298052	0.159181	0.353787
湖 北	2011	2.03196	410	1000	172	125	103	27154.9	213.52	451.26	1632.06	3017.79	1931.8	9.4018	422.061	12383	3400	212747	914.52	431.766	2.85	2	1340298	11	108.101	930	0.152381	144.944	0.0721267	0.243444	0.293305
湖 南	2011	1.49325	454	713	114	85	126	25100	227.63	488.9	2801.17	1442.91	1718	10.1434	507.976	10904	3700	232190	664	439.94	2.19	2	1067852	3	98.805	471	0.195253	94.6667	0.181832	0.147794	0.272796
广 东	2011	2.24589	959	1376	401	161	122	21067.5	3331.63	896.93	2761.33	4419.49	3931.71	139.062	4379.12	16668	2800	190724	7981	1888	2.02	10	1527254	8	337.369	2388	0.261121	285.5	0.326328	0.0477803	0.431104
广 西	2011	1.22769	317	459	149	71	107	17257	302.79	416.18	974.35	1207.26	1209.5	10.5188	299.971	9210	3200	104889	1331	326.547	2.32	3	600094	10	82.743	237	0.134118	43.6522	0.0961999	0.211309	0.271197
海 南	2011	0.50278	153	295	86	18	18	2919.88	81.43	67.62	194.76	607.54	299.47	3.7615	124.746	4608	700	22916	1697	93.7998	1.73	2	156700	1	37.297	94	0.333916	83.5294	0.142479	0.0649292	0.242672
重 庆	2011	1.05167	239	375	282	39	40	22019.9	186.4	381	1720.98	1530.95	1202.76	9.6806	283.024	4885	1400	118562	1102	243.923	1.76	3	567813	1	93.801	762	0.204362	219.563	0.202204	0.158167	0.290495
四 川	2011	1.76363	420	629	370	144	183	35000	163.97	612.36	3635.26	2787.61	2473.4	5.9383	905.399	12441	3500	283268	2485.17	606.877	2.82	8	1139316	4	205.784	1209	0.151429	56.1667	0.110046	0.13585	0.288189
贵 州	2011	0.624621	289	253	45	53	87	16960.8	58.51	290.41	973.53	423.63	1420.7	1.3507	187.667	6247	2100	157820	747.02	219.324	2.05	1	344100	4	74.805	152	0.104167	32.1765	0.0634003	0.234984	0.54761
云 南	2011	1.70928	563	587	161	84	131	16331.8	395.38	692.46	1020.49	1549.78	1195.73	16.0861	326.043	6564	2500	214524	758.5	324.07	2.19	1	487552	13	121.629	222	0.133264	30.3684	0.158521	0.372022	0.330149
西 藏	2011	0.0859714	85	97	47	2	73	842.7	27.08	30.34	20.58	206.42	88.6341	1.2963	22.6961	743	500	63108	183.14	25.5133	3.38	0	32374	1	19.239	7	0.114286	0.391667	0.0405146	0.230801	0.280682
陕 西	2011	1.50824	302	607	115	122	109	18135	270.41	223.91	2202.49	2168.81	1240	12.9505	272.384	10835	4100	151986	777	348.546	3.52	3	964773	12	119.207	768	0.166853	74.1579	0.0787808	0.171962	0.234552
甘 肃	2011	1.12564	296	381	84	145	86	5826.48	9.11	137.02	1109.39	2019.87	333	0.174	102.691	4331	2400	123696	102	172.285	2.34	0	405306	1	83.375	234	0.116098	13.359	0.0301784	0.0958188	0.173096
青 海	2011	0.415317	96	209	38	22	46	1407.2	5.17	42.65	81.43	275.42	91	0.2659	31.3534	1206	1900	64280	102	48.288	4.65	0	45721	1	34.114	31	0.108333	1.33333	0.0216105	0.118983	0.133935
宁 夏	2011	0.669074	66	107	37	6	21	1167.7	1.95	99.57	77.94	526.5	83.8	0.062	61.8036	2661	1300	24506	161.4	57.5841	3.23	0	87870	2	35.539	98	0.110769	33.1818	0.0569705	0.0774416	0.107546
新 疆	2011	1.77295	429	375	133	73	97	3829	56.37	298.9	509.78	1000.15	411	4.6519	138.729	3385	4300	155150	532	231.811	3.26	0	258719	2	87.971	56	0.154622	3.06875	0.0506827	0.110599	0.209619
北 京	2012	2.25352	584	1021	324	41	19	22633.7	500.86	324.26	528.77	1008.13	3301.3	51.5	303.903	21573	1300	21492	6389	631.234	3.24	7	591243	2	228.738	1963	0.325043	1622.62	0.52575	0.162085	0.647896
天 津	2012	0.587644	103	344	48	20	18	13704.7	73.75	75.35	493.88	231.46	1599.74	22.3	209.382	6828	900	15391	1009	185.002	1.84	7	473114	1	79.282	398	0.191818	922.727	0.0900118	0.500503	0.327508
河 北	2012	2.09016	404	1252	448	75	168	22911	129.32	306.59	1666.77	5733.5	1553.91	5.4	385.548	14086	5600	163045	272	598.285	4.18	0	1168796	12	114.728	451	0.173045	99.3684	0.0259384	0.219298	0.168956
山 西	2012	1.17807	280	796	301	92	119	19434	189.18	251.92	1247.16	5258.77	1766.28	7.2	226.472	8762	3800	137771	832	338.937	3.09	0	637330	18	131.218	582	0.143325	121.8	0.0476852	0.490737	0.418207
内蒙古	2012	1.11056	245	779	137	65	103	5887.31	159.17	215.86	939.77	2040.04	1080.65	7.7	191.733	6065	9500	163763	605	273.343	5.08	0	391434	9	162.157	436	0.146906	9	0.0264855	0.218835	0.216389
辽 宁	2012	1.54232	399	1141	155	62	99	36282	473.13	747.95	1069.82	792.04	3742	32.6	296.319	9387	5000	105562	857.3	516.075	2.46	2	934078	12	147.143	717	0.193896	197	0.0619227	0.355867	0.337932
吉 林	2012	1.0611	192	540	41	68	63	8854.28	118.27	267.32	860.01	591.32	1146.89	4.9	90.2986	6538	4400	93208	360	262.911	3.67	0	578953	9	94.962	162	0.184848	50.3889	0.0232459	0.123454	0.296703
黑龙江	2012	1.21943	236	654	85	104	131	25174	207.62	313.63	1310.2	721.56	1248	8.4	133.57	5077	6000	159063	1093	329.814	5.14	26	704538	3	93.551	246	0.145041	24.4783	0.0388306	0.484343	0.281511
上 海	2012	0.989645	281	1090	147	90	26	25093.7	651.23	235.81	1633.1	1514.52	2877.25	54.9	2297.15	11790	500	12541	3974	637.925	2.66	12	506596	2	287.144	1417	0.344754	2734.48	0.428239	2.37081	0.745189
江 苏	2012	4.50745	732	1996	434	266	105	46437.4	791.54	576.06	5500.36	3768.94	6055.8	63	1038.94	15993	2400	154118	662	1120.36	3.59	20	1671173	10	297.752	1812	0.238824	574	0.114818	0.176418	0.40904
浙 江	2012	3.52392	783	1894	609	166	90	39124	865.93	546.16	3122.31	8624.35	4476	51.5	1345.02	16469	1800	113550	1670	1025.09	4.18	26	932292	7	357.094	1273	0.248026	368	0.137263	0.171546	0.423883
安 徽	2012	2.72722	383	986	1015	141	107	29229.1	331.47	286.72	2164.96	6932	2519.1	15.6	467.982	9219	3300	165157	239	418.104	2.32	2	1023033	11	90.303	836	0.147844	204.615	0.0608629	0.138501	0.323549
福 建	2012	1.69201	390	760	341	94	85	16660	493.67	273.8	1843.02	3211.12	1702.44	42.3	827.115	12115	2300	94661	1684.39	592.904	2.69	1	701392	10	127.062	719	0.207918	227.583	0.158565	0.209087	0.252322
江 西	2012	1.29728	303	760	187	109	102	19636.8	156.18	295.75	1877.04	2657.62	1372	4.8	508.368	6928	2800	150595	219	310.384	2.25	4	851119	13	79.76	242	0.144236	64	0.0606689	0.23496	0.318669
山 东	2012	3.28632	796	1963	303	178	140	48739	469.91	509.69	3843.28	2451.5	4335	29.2	433.379	16471	4300	244586	1903	891.567	1.99	13	1658490	7	206.838	2168	0.206954	483.533	0.0773331	0.185252	0.284693
河 南	2012	2.68075	339	1141	364	180	186	34775.8	190.77	528.12	3425.47	7750.81	3196.67	6.1	392.953	15869	4900	249649	1870.98	680.033	3.12	4	1559025	19	150.441	1374	0.142555	267.438	0.0324718	0.16872	0.351074
湖 北	2012	2.31348	367	1041	226	161	105	34230	264.72	338.93	2229.74	3014.43	2553.55	12	456.68	12601	3800	218151	933.5	491.295	2.59	3	1386086	11	138.694	1175	0.160619	183.889	0.103972	0.271444	0.325845
湖 南	2012	1.81649	449	723	157	95	127	30534.3	224.55	513.91	3213.86	1583.78	2175.46	9.3	784.097	11854	3800	234040	708	491.207	2.34	2	1082235	4	126.938	489	0.218401	114.952	0.204416	0.166863	0.281678
广 东	2012	2.55113	927	1512	337	168	123	23911.5	3489.43	622.85	3203.51	9082.23	4807.86	156.1	7020.73	18270	2800	194943	8535	2161.56	2.06	9	1616838	7	384.588	2540	0.253143	302.778	0.309814	0.0477148	0.469286
广 西	2012	1.50402	339	510	68	79	108	20778	350.27	551.02	1124.96	757.91	1578.9	12.8	274.273	8687	3200	107906	1427	366.361	2.33	0	629243	10	117.052	277	0.137391	52.6087	0.0991885	0.234164	0.308111
海 南	2012	0.718451	155	311	61	19	18	3238.8	81.58	59.33	255.81	413.05	356.79	3.5	184.428	3748	700	24265	1871	104.891	1.92	1	168270	1	57.209	96	0.344151	70.5882	0.14368	0.0704712	0.221682
重 庆	2012	1.54985	240	435	244	39	40	28806.1	224.28	219.1	1643.48	1176.04	1576.7	11.7	329.814	5452	1500	120728	1253	276.993	1.78	2	623605	1	120.734	769	0.218092	235.237	0.233105	0.185444	0.302044
四 川	2012	2.06441	396	534	469	152	183	44000	227.34	1195.44	4210	3963.06	3229.83	8	955.99	15457	3500	293499	2644.69	692.308	2.89	7	1223680	6	274.876	1398	0.160957	68.8125	0.134188	0.159314	0.312737
贵 州	2012	0.725135	290	278	79	66	87	21330.7	70.5	296.5	936.49	664.28	1849.49	1.7	265.278	8066	2100	164542	890.99	262.045	2.09	4	383815	2	96.876	184	0.110802	46.9412	0.0767027	0.256219	0.456526
云 南	2012	1.84643	480	602	220	85	131	19630.3	457.84	580.75	1078.36	2226.98	1579.49	19.5	341.31	8389	2600	219052	848.7	363.442	2.79	0	512178	13	130.776	296	0.152437	39.6316	0.188462	0.414561	0.334981
西 藏	2012	0.205278	102	99	92	2	73	1038.89	19.49	39.32	23.91	224.31	119.802	1.1	25.2091	975	500	65198	221.7	34.8584	0.77	0	33452	1	27.131	14	0.110909	0.541667	0.0523167	0.274991	0.294825
陕 西	2012	1.6204	283	644	116	194	111	22941	335.24	187.96	2550.32	2418.3	1610	16	241.037	11700	4100	161411	797	386.41	3.48	2	1026254	11	153.402	852	0.16314	92.3158	0.0842982	0.208245	0.237399
甘 肃	2012	1.15179	287	427	103	149	86	7824.26	10.2	127.67	1179.1	1908.9	470	0.2	99.5421	5712	2500	131201	117	189.878	2.36	1	431069	1	91.199	306	0.129707	17.3333	0.0284266	0.121726	0.21004
青 海	2012	0.589067	84	212	40	22	46	1576	4.73	52.64	88.22	414.22	122	0.2	52.2028	1602	1900	65988	138	57.0389	4.32	0	48668	1	51.457	29	0.127273	1.52778	0.029793	0.124545	0.134534
宁 夏	2012	0.663923	77	101	16	9	20	1338.99	1.9	344.5	84.01	313.13	103.05	0.1	27.6938	3391	1300	26522	187.9	65.6615	2.3	0	96440	2	44.538	94	0.134667	35.7576	0.0785292	0.0820444	0.104312
新 疆	2012	1.92609	441	398	137	72	100	4711	62.49	334.51	607.28	993.41	541.7	5.5	131.165	3104	4700	165909	663	263.356	3.22	0	268716	2	125.076	75	0.164957	3.2875	0.0564886	0.124532	0.208296
北 京	2013	2.25606	577	1145	292	41	20	24738.8	450.13	434.97	500.63	983	3666.3	47.9	705.314	24401	1300	21673	6988	757.035	3.05	45	598904	2	244.62	1822	0.316994	1482.14	0.526894	0.392592	0.649524
天 津	2013	0.69115	93	383	58	20	19	17709.8	75.86	86.46	546.07	284.94	1848.18	25.9128	95.6813	6784	1000	15718	1186	213.084	1.8	6	489919	1	95.616	423	0.167444	992.727	0.0999277	0.988387	0.326309
河 北	2013	2.31909	409	1271	500	103	182	26988	84.27	387.33	2479.96	5182.83	1973.82	5.8578	245.065	10076	6300	174492	300.8	728.725	4.07	2	1174374	11	127.775	467	0.151392	108.842	0.0315052	0.438646	0.176869
山 西	2013	1.33757	272	788	226	97	131	24605	53.84	231.2	1029.9	3700.76	2253.65	8.2268	369.22	5824	3800	139434	974	392.267	3.19	1	676817	27	141.055	568	0.113311	132.467	0.0477929	0.706569	0.407322
内蒙古	2013	1.10972	268	890	144	72	118	6612.76	161.61	305.23	908.46	1373.14	1343.73	9.6229	203.951	6351	10200	167515	701	311.228	4.85	0	399201	10	173.791	427	0.129626	9.65455	0.0212521	0.325401	0.227594
辽 宁	2013	1.9767	421	1165	212	63	124	40427.2	503.1	702.68	1178.21	850.67	4432.6	34.7714	348.777	8026	5100	110973	915	582.215	2.37	5	968034	11	139.102	715	0.180225	219.333	0.0736408	0.446178	0.325552
吉 林	2013	1.56549	189	553	54	73	78	10241.9	124.3	242.12	725.92	424.19	1441.64	5.52	104.538	3959	4400	94191	415	295.464	3.51	3	599526	9	111.561	162	0.190599	51.3889	0.0205159	0.303569	0.349332
黑龙江	2013	1.13482	223	664	35	156	148	29004	152.86	353.31	1823.76	404.43	1348	6.04	145.374	4323	6000	160206	1246	377.341	4.74	36	717856	4	96.252	210	0.144375	25.9783	0.0423977	0.639883	0.238631
上 海	2013	1.01183	256	1139	148	100	26	25990.7	614.09	210.32	1767.8	1174.97	2968	52.44	608.555	12329	500	12633	4173	791.815	2.58	2	504771	2	294.524	1638	0.375728	2918.97	0.493093	2.27576	0.674806
江 苏	2013	5.21343	735	2073	291	292	116	51539.2	288.03	497.08	6117.61	2663.15	6940.05	23.79	1002.02	16433	2600	156094	728	1402.8	3.62	20	1684455	10	369.077	2402	0.203061	868.1	0.111461	0.34222	0.398012
浙 江	2013	3.70987	828	1988	733	183	102	43439	337.57	579.19	3789.45	9272.08	5202	53.93	1079.37	14759	2000	115426	1915	1283.52	3.98	20	959629	7	360.199	1506	0.214239	421.6	0.121155	0.323436	0.409728
安 徽	2013	3.08059	377	1037	991	154	120	33601.1	271.95	389.22	2037.23	8578.15	2903.2	16.6	644.94	9133	3500	173763	264	533.983	2.26	16	1052123	11	111.141	1032	0.125917	264.923	0.055845	0.267326	0.30248
福 建	2013	1.9661	401	784	506	98	98	19542	294.02	246.65	2125.04	4156.54	2003.41	45.73	546.156	10981	2700	99535	1857.21	738.446	2.79	2	730510	10	144.997	797	0.198755	281.917	0.183802	0.359952	0.244171
江 西	2013	1.80748	341	768	229	137	118	24322.1	123.89	402.1	2656.71	2379.21	1863.6	5.2508	309.556	5920	3100	152067	681.1	379.231	1.98	1	861849	14	89.733	241	0.130593	71.875	0.0568409	0.375706	0.355287
山 东	2013	4.04808	792	2001	414	194	159	54262	285.98	652.68	4335.78	3602.16	5014.7	27.31	532.81	15440	4300	252786	2355	1063.83	1.95	8	1698545	6	246.349	2430	0.196483	580.2	0.0704855	0.726587	0.277893
河 南	2013	2.84945	362	1133	429	222	205	39522.7	127.38	615.75	4181.12	9122.38	3694.39	6.59	402.501	14826	4900	249831	2200	837.832	3.05	4	1618320	18	161.446	1374	0.132959	301.438	0.0277351	0.291037	0.3196
湖 北	2013	2.79546	378	1058	307	170	120	40621	267.96	463.35	2357.62	2880.09	3130.13	12.18	507.834	11790	3900	226912	936.73	610.163	2.59	3	1421434	12	154.138	1861	0.145968	281.167	0.108243	0.446765	0.321664
湖 南	2013	2.10496	414	770	227	103	142	35968.7	230.66	581.45	2836.35	1774.92	2630.92	3.31	442.025	10406	4000	235392	757	595.287	2.32	6	1100770	7	144.707	587	0.199774	162.857	0.168752	0.226634	0.274194
广 东	2013	3.05273	917	1656	405	175	147	26753.1	3397.9	971.79	3598.92	4600.53	5708.64	162.78	2134.75	19641	3500	202915	8997	2768.09	1.95	10	1709881	7	419.594	2883	0.23965	377.222	0.328646	0.196911	0.44543
广 西	2013	1.60767	381	513	59	104	123	24264	281.74	658.55	1253.16	881.79	1961.3	15.72	302.893	7357	4000	111384	1571	435.264	2.29	4	656127	10	131.614	303	0.121451	57.4348	0.0838923	0.498134	0.309292
海 南	2013	0.91338	150	352	67	18	21	3596.87	75.64	119.79	274.36	972.29	408.05	3.31	366.195	2750	700	24852	2200	126.425	1.86	2	172143	1	62.25	84	0.356073	70.5882	0.122774	0.275552	0.194903
重 庆	2013	1.77065	234	504	443	71	41	31920	115.17	367.34	1916.12	1409.86	1775.52	12.68	326.976	3925	1700	122846	1461.43	357.59	1.85	1	659400	1	121.134	1015	0.200859	286.513	0.211022	0.491462	0.261044
四 川	2013	2.90521	461	586	510	188	207	49000	209.56	1092.7	4834.45	12541.4	3830.04	7.64	864.282	13392	3500	301816	3410	842.833	2.9	2	1270818	6	304.646	1611	0.146391	79.9583	0.126504	0.365125	0.295317
贵 州	2013	0.983471	305	273	106	75	98	26683.6	62.4	225.42	1264.86	1229.47	2358.18	2.01	260.708	6858	2100	172564	1125.46	331.77	2.06	0	419040	2	96.869	304	0.106308	69.2941	0.0687139	0.320558	0.426146
云 南	2013	1.83617	563	622	259	84	148	23972.3	287.88	598.67	1238.43	2325.28	1961.55	24.19	402.101	6823	2600	222940	1000	452.755	3.14	0	548577	9	143.712	360	0.148525	47.7105	0.182365	0.509387	0.308278
西 藏	2013	0.462321	109	102	79	2	82	1268.74	22.32	24.12	34.49	257.3	157.263	1.2786	55.298	629	500	70591	275.89	41.7375	4.62	0	33562	1	31.966	13	0.0993133	0.533333	0.047914	0.887602	0.288071
陕 西	2013	1.8055	333	679	119	221	122	28161	253.47	297.49	2874.82	2681.2	2031	16.762	202.502	9859	4400	165249	849	477.836	3.81	4	1077627	11	191.783	958	0.148487	119	0.0696381	0.405149	0.228279
甘 肃	2013	1.21901	304	431	124	143	103	10068.4	9.78	196.01	1766.9	2190	619	0.2039	159.687	4505	2600	133597	771	238.709	2.41	1	442963	1	98.665	346	0.126168	20.7692	0.0263723	0.278688	0.195638
青 海	2013	0.543777	125	217	37	22	55	1775.8	4.65	65.85	54.41	163.48	157	0.1942	37.2947	1199	1900	70117	167	67.4648	3.98	0	50675	1	50.669	37	0.115301	1.95833	0.0279065	0.371708	0.135101
宁 夏	2013	0.667811	84	95	33	11	26	1817.88	2.54	345.53	110.67	595.78	126.55	0.12	75.1396	1598	1300	28554	204.2	80.4293	2.54	0	104451	2	38.052	90	0.111091	38.7879	0.0751543	0.21626	0.09345
新 疆	2013	2.34623	385	414	123	76	116	5049	68.88	275.45	635.54	865.7	637.43	5.85	184.205	2531	4700	170155	706	317.068	3.16	2	278425	2	138.694	77	0.138443	3.83125	0.0474188	0.125052	0.182055
北 京	2014	2.26383	523	1302	344	41	20	25722.2	427.45	137.91	497.83	1026.1	3997	46.1	686.52	33594	1284.75	21849	6752	889.895	2.92	8	604578	2	249.386	1873	0.29279	1677.38	0.580657	0.401914	0.64058
天 津	2014	0.755898	93	377	66	22	19	15271.7	76.63	90.79	925.78	418.38	2135.21	29.921	78.1287	6515	970.927	16110	1382	243.61	1.53	5	505795	1	122.666	400	0.165864	1051.82	0.152147	0.838705	0.316566
河 北	2014	2.37288	391	1343	458	105	180	31368	75.61	356.79	2494.05	5369.72	2528.66	5.34	206.903	9278	6252.77	179200	338	825.525	3.92	2	1164341	12	143.751	467	0.131003	121.842	0.0315052	0.517802	0.20486
山 西	2014	1.57252	251	771	351	99	131	29951	56.56	189.45	1221.54	3592.06	2829.29	2.8073	212.701	7571	4979.52	140436	990	431.127	2.98	2	713218	27	140.919	506	0.0977657	139.6	0.0477929	0.878226	0.444469
内蒙古	2014	1.28359	272	887	177	75	118	7414.88	167.31	267.51	989.64	1779.29	1744.97	10.0296	255.036	6635	10226	172167	742	336.036	4.67	1	406414	11	189.673	387	0.120681	10.9091	0.0184431	0.414703	0.231468
辽 宁	2014	1.69917	405	1210	207	63	125	45925	260.7	392.41	1152.14	826.21	5190.2	16.18	307.025	7024	5129.57	115430	1213	647.287	2.35	2	998281	11	148.061	637	0.179511	221	0.0736408	0.490439	0.383311
吉 林	2014	1.37281	187	582	56	78	78	12003.5	130.63	163.51	959.4	502.68	1766.55	6.8	121.96	5063	4520.49	96041	461	328.199	3.23	9	618273	8	136.021	162	0.156598	55.0556	0.0239523	0.346652	0.406165
黑龙江	2014	2.20138	203	663	39	158	148	10531	141.72	274.71	2065.52	310.67	1031	5.6	140.529	5040	6019.33	162464	1472	430.472	5.13	20	730614	4	125.077	176	0.145098	26.8261	0.0423977	0.227848	0.197364
上 海	2014	1.03519	240	1185	158	103	25	26818.1	639.62	217.42	1967.07	1017.08	3202.47	56.01	411.103	14779	465.01	12945	4522	906.007	2.54	3	506644	2	332.623	1892	0.341359	3498.28	0.501532	2.06183	0.6598
江 苏	2014	5.82561	650	2099	287	301	115	57113.3	297.1	556.08	7044.37	2605.92	7863.51	30.32	885.909	17626	2677.95	157521	809	1680.33	3.75	28	1698636	9	343.98	2122	0.20328	814.7	0.120989	0.369896	0.381941
浙 江	2014	3.9464	792	2036	891	187	102	47875	370.88	805.65	4121.07	14669.6	5947	57.53	1127.32	17485	2347.16	116367	2169	1682.62	3.96	13	978216	7	379.174	1544	0.219974	469.5	0.126066	0.37071	0.391705
安 徽	2014	3.43785	367	1046	988	164	120	37898.8	280.18	426.34	2405.68	14095.7	3309.7	18.4	392.87	11228	3548.44	174373	270	630.023	2.23	0	1080545	11	119.933	1097	0.122194	304.385	0.0481305	0.273581	0.288307
福 建	2014	2.23016	374	805	393	98	97	22888	318.9	200.06	2308.21	4182.35	2405.84	49.11	2426.38	10978	2759.13	101190	2045.9	856.935	2.74	4	748480	10	148.123	864	0.189332	344.833	0.196225	0.395222	0.239615
江 西	2014	2.0098	322	751	219	137	118	30125.3	147.67	373.7	2475.88	2238.9	2615.17	5.5687	282.35	7169	3702.27	155515	930	445.805	2.01	2	916415	14	103.717	236	0.131978	87	0.0568409	0.446538	0.392915
山 东	2014	4.31654	724	2054	481	243	158	59577.4	300.19	740.42	4818.26	3746.61	5711.2	23.3	352.027	16081	5028.92	259515	2596	1212.65	2	7	1796665	6	253.539	2268	0.194692	586.2	0.0704855	0.805049	0.291237
河 南	2014	2.94029	303	1100	598	248	205	44917.5	124.76	520.9	4531.5	11110.2	4269.6	5.38	400.565	15862	5199.76	249857	2448	1011.06	3.01	9	1679744	18	173.942	1311	0.130709	356.875	0.0277351	0.321317	0.307295
湖 北	2014	3.05656	416	1050	273	174	121	46900	277.07	543.25	2599.61	3344.36	3752.11	12.38	606.532	12257	4059.31	236933	1031.3	719.09	2.73	2	1419699	12	168.048	1883	0.142892	306.056	0.108243	0.46835	0.305005
湖 南	2014	2.19217	420	751	271	109	143	47229.9	219.55	690.23	3574.43	1711.72	3002	2.66	624.6	10198	4550.47	236250	870	744.879	2.31	3	1136302	7	162.613	598	0.202877	175.619	0.178821	0.293192	0.258057
广 东	2014	3.55885	832	1792	325	176	147	29405.8	3355.43	909.01	4020.58	2741.68	6801.25	170.76	947.527	23462	4026.98	212094	9771	3353.35	1.89	8	1794188	7	452.26	2914	0.243026	418.611	0.356548	0.181212	0.446941
广 西	2014	1.98778	401	537	67	106	123	28565	295.76	632.31	1507.83	663.89	2495	17.28	247.01	7457	4741.53	114900	1803	502.098	2.15	1	701913	10	144.457	305	0.119935	67.0435	0.108814	0.55604	0.338967
海 南	2014	0.927688	133	352	71	18	21	4722.99	66.14	65.69	156.91	1672.97	468.65	2.66	112.217	3805	693.734	26002	2448	139.429	1.83	1	180565	1	60.611	62	0.37581	65.8824	0.151183	0.337032	0.191856
重 庆	2014	1.93553	236	504	512	78	41	35370.6	126.36	382.16	2153.97	1557.48	1999.42	13.544	334.687	5702	1781.24	127392	1657.25	417.903	2.29	6	691555	1	133.289	1120	0.206098	344.593	0.105588	0.51897	0.248194
四 川	2014	3.23178	388	457	492	206	207	53549.7	240.17	992.88	5329.16	1887.34	4838.34	8.57	822.511	14458	3976.01	309742	3751.8	1026.97	2.17	2	1328329	6	349.146	1547	0.152934	87.0625	0.126504	0.38901	0.308244
贵 州	2014	1.14389	282	299	105	74	98	32049.4	65.31	290.54	1293.33	611.38	2882.66	1.888	301.172	5755	2373.1	179079	1420.68	381.671	2.17	9	460401	2	105.913	385	0.100657	86.0588	0.0689145	0.370965	0.407403
云 南	2014	1.89047	624	704	284	86	148	28116.5	286.56	512.25	1678.7	2605.57	2516.87	24.21	462.689	7693	2915.91	230398	1104.1	566.848	2.87	1	577044	9	174.862	361	0.135444	51.7632	0.22498	0.578708	0.320051
西 藏	2014	0.453869	113	102	88	4	82	1528.7	24.44	35.97	37.8	411.59	194.999	1.4469	58.6824	285	786.345	75470	315.14	47.8254	4.51	0	33474	1	50.826	10	0.110752	0.633333	0.0283062	0.988433	0.293567
陕 西	2014	2.11702	325	687	143	238	122	32953	266.3	256.86	3830.77	2110.11	2435	14.163	217.879	11116	4524.12	167145	1020	566.604	4.3	6	1099613	11	193.209	968	0.146129	133.789	0.0659562	0.447773	0.224582
甘 肃	2014	1.34295	313	423	190	147	103	12660.2	4.88	205.76	2007.79	2149.94	779.6	0.1017	148.908	5410	3403.43	138084	866	277.52	2.5	2	452300	1	110.71	339	0.12877	23.359	0.0263724	0.324865	0.192045
青 海	2014	0.636317	144	237	64	22	55	2000.4	5.15	80.33	232.57	261.35	200	0.2474	40.0131	809	2124.6	72703	410	80.7455	4.04	0	52907	1	63.784	40	0.112099	2.08333	0.0291723	0.368364	0.130931
宁 夏	2014	0.670336	90	114	31	12	26	1671.62	3.37	155.41	128.23	414.3	141.56	0.18	75.6615	1431	1289.47	31276	245.6	102.633	2.51	1	111432	2	46.671	79	0.104615	41.9697	0.0839262	0.182335	0.0858147
新 疆	2014	2.6203	366	430	122	82	117	4803	54.01	312.31	652.34	923.15	619.53	4.9704	151.491	3282	5462.83	175468	727	349.258	3.36	1	290418	2	148.975	81	0.1213	4.8	0.0474188	0.130651	0.138954
北 京	2015	2.3713	509	1397	395	40	20	27279	419.96	138.34	579.29	1085.18	4320	46.1	6400.58	35067	1284.75	21885	7172	1181.88	2.88	6	603557	2	275.832	1408	0.347078	1168.45	0.508433	0.44072	0.639612
天 津	2015	0.79726	87	400	86	22	19	17058.7	78.48	116.74	1002.66	672.63	2466.8	32.9811	469.827	6360	1043.74	16550	1503	321.047	1.52	5	512854	1	153.744	378	0.166804	1073.64	0.10255	0.934183	0.329919
河 北	2015	2.60751	377	1360	596	107	180	37060	76.64	491.37	2645.6	4559.02	3395.6	6.21	246.888	10764	6958.11	184553	358	997.935	3.72	10	1179172	12	185.348	440	0.137954	125.737	0.0251754	0.697089	0.258248
山 西	2015	2.03181	196	783	456	100	131	36007	59.38	295.28	1465.58	3951.5	3428.91	3	176.035	7713	5085.78	140960	1088.8	515.931	2.93	3	740245	31	182.007	469	0.0889919	136.933	0.0746041	1.21798	0.471989
内蒙古	2015	1.50379	278	953	175	84	119	8352	160.78	362.04	1149.58	1123.49	2193.77	9.62489	165.419	6698	12094.2	175374	852	400.301	4.76	7	420807	11	228.905	377	0.115643	11.6727	0.022407	0.527914	0.34707
辽 宁	2015	1.94933	382	1253	263	64	124	39710.7	264.01	425.83	1157.61	905.57	3620.1	16.8272	322.505	10098	5773.39	120365	1354.15	804.468	2.22	10	1005650	9	165.405	533	0.185155	203.333	0.0997939	0.542459	0.370728
吉 林	2015	1.94029	164	651	49	76	78	13982.8	148.1	221.79	949.09	371.85	2220.73	2.72	124.835	4189	5052.66	97326	536	387.257	3.11	3	632723	9	156.425	184	0.173191	66.1667	0.0288779	0.38865	0.445774
黑龙江	2015	2.64145	206	672	51	158	148	12926	83.47	351.18	2091.83	327.59	1337	3.8686	152.091	5759	6233.76	163233	1682	511.443	4.66	20	735151	4	152.601	152	0.156217	26	0.0470579	0.303468	0.239404
上 海	2015	1.11435	228	1225	180	99	25	27569	653.59	255.5	1935.12	862.86	3455.47	59.6	2934.15	16909	465.089	13195	5000	1164.51	2.57	10	511623	2	365.523	1770	0.357055	3348.28	0.573201	2.0386	0.640791
江 苏	2015	6.32488	608	2160	369	312	115	61933.7	305.01	682.3	7849.64	2809.1	8769.31	35.3	1563.96	21424	2723.84	158805	882	2316.49	3.82	27	1715749	9	403.417	2065	0.206878	829	0.150287	0.45	0.392895
浙 江	2015	4.98296	688	2028	1024	224	102	52532	459.02	987.87	4577.15	15336.7	6720	67.88	2044.01	19857	2563.65	118015	2364	2424.55	3.78	42	991149	7	488.225	1554	0.223056	523.8	0.12748	0.475814	0.391682
安 徽	2015	4.0897	339	1068	1617	171	122	44403.7	291.12	553.68	2679.93	10686.2	3980.5	22.63	874.649	11989	4168.81	186940	297	823.458	2.16	7	1130748	11	146.252	1183	0.121529	331.692	0.0664282	0.51486	0.318916
福 建	2015	2.74362	352	846	397	98	97	26129	332.71	244.36	2412.13	2760.07	2798.16	55.61	1088.22	13381	3200.81	104585	2385.01	1077.84	2.7	9	758452	10	187.522	921	0.198107	403.917	0.242534	0.512368	0.236999
江 西	2015	2.7599	311	750	236	137	118	37313.3	155.88	440.93	2949.23	1543.83	3600.45	5.67	283.481	7354	4009.74	156625	985	620.075	1.8	16	984489	14	127.094	294	0.136403	114	0.0505151	0.600291	0.462059
山 东	2015	5.0162	650	2109	623	312	157	65045.4	312.22	1014.92	5129.76	3871.62	6505.1	28.9651	478.337	20441	5434.45	263447	3184	1474.59	2.03	21	1900612	7	299.77	2122	0.201152	580.333	0.0808646	1.08287	0.307371
河 南	2015	3.72264	303	1082	824	248	205	51048.7	135.3	685.6	4727.55	19415.7	4934.38	455.546	479.523	17982	5296.17	250584	2516	1328.15	3.04	23	1766869	17	206.034	1324	0.127753	406.938	0.0219566	0.409422	0.294415
湖 北	2015	3.50356	361	1037	282	175	122	50668.2	311.76	521.68	2623.91	2901.7	4206.02	16.72	457.065	13139	4062.28	252980	1082.13	965.751	2.78	7	1410567	11	235.648	1667	0.146922	285.5	0.126462	0.499631	0.296336
湖 南	2015	2.63448	429	835	273	113	143	52756.8	226.05	733.4	4758.48	1911.42	3660	2.48	818.632	13285	4539.57	236886	935	906.661	2.26	16	1180643	7	193.798	707	0.206911	191.81	0.142814	0.403493	0.268204
广 东	2015	3.87059	735	1901	391	177	146	32779.8	3450.35	759.16	4251.6	2141.95	7976.6	178.27	6727.85	26672	4035.21	216023	10054	4378.78	1.9	16	1856355	7	539.257	2893	0.244974	432.611	0.319687	0.292353	0.460506
广 西	2015	2.27237	400	539	92	124	123	33661	450.35	748.02	1655.48	1824.04	3136.4	19.44	351.297	8360	5117.19	117993	1885	651.534	1.43	3	751181	10	172.23	318	0.12712	76.1739	0.0739979	0.694714	0.363795
海 南	2015	1.15901	123	363	66	18	21	5275.68	60.84	104.76	136.89	701.21	528.08	2.48	148.261	5432	1033.42	26860	2516	183.922	1.57	3	182944	1	57.512	53	0.40263	57.0588	0.111918	0.388731	0.185548
重 庆	2015	2.22234	212	522	730	78	41	39200	148.1	497.71	2298.77	2222.5	2251.3	14.686	1104.85	7118	1922.79	140551	1882.23	554.562	2.4	22	716580	1	169.727	1273	0.218184	387.12	0.0778278	0.631777	0.242011
四 川	2015	3.69001	395	502	543	225	207	58500.6	273.2	1168.7	5996.77	2011.78	6137.6	11.809	742.388	18698	4442.19	315582	4204	1297.59	2.14	27	1387889	6	395.788	1510	0.157768	88.4375	0.147634	0.432258	0.334604
贵 州	2015	1.43591	298	306	95	73	98	37536	68.59	475.09	1581.41	682.47	3500.46	2.313	322.582	8803	2810.11	186407	1563.28	515.163	2.24	9	500882	2	119.936	385	0.102902	97.1176	0.0792046	0.429567	0.405249
云 南	2015	2.11951	614	766	276	86	148	32344	570.08	617.45	1700.37	1939.96	3104.37	28.76	458.288	8770	2929.36	236007	1210.32	792.575	2.94	2	614569	10	191.211	380	0.150209	52.9474	0.0934685	0.674557	0.333434
西 藏	2015	0.731452	55	196	87	7	82	1988.3	29.26	54.27	48.6	389.84	271.061	1.7666	49.5119	694	786.345	78348	363.06	56.3824	4.19	0	34203	1	57.816	9	0.115747	0.633333	0.0470131	1.8482	0.285056
陕 西	2015	2.62081	353	680	177	249	122	38274	293.03	380.43	4208.24	4322.37	2904	20.0022	231.5	9227	4549.17	170069	1125	760.965	4.58	12	1099693	9	205.168	1022	0.139438	150.105	0.0933561	0.553486	0.25041
甘 肃	2015	1.75551	296	445	191	150	103	15632.9	5.45	240.43	2190.99	2034.22	975	0.1418	179.678	7335	3847.23	140052	1061	365.615	2.39	1	450463	1	113.802	340	0.135033	26.1795	0.0171365	0.386578	0.19787
青 海	2015	0.684192	158	238	54	23	55	2009.3	6.53	93.93	147.39	333.27	246	0.3867	51.8006	1334	2349.5	75593	434	105.376	3.73	2	57460	1	65.393	43	0.100806	2.68056	0.0342692	0.359834	0.146123
宁 夏	2015	0.950635	86	111	40	12	26	1835.8	3.73	221.7	198.04	492.56	160	0.2083	65.5253	1957	1289.47	33240	266.5	135.416	2.63	0	115007	2	58.611	80	0.100129	41.6667	0.0774378	0.197797	0.0927967
新 疆	2015	3.02267	357	443	132	86	118	5929	53.14	369.81	755.97	1206.87	985	6.0775	142.626	2887	5867.64	178263	763	404.8	3.44	4	304682	2	160.088	93	0.126319	5.4375	0.0488652	0.166411	0.184867
北 京	2016	2.37849	416	1344	485	41	21	28115	416.53	157.97	648.904	877.01	4683	50.7	8671.44	35377	1264.3	22026	7872	979.084	2.87	13	599188	2	352.798	1324	0.377875	1144.64	0.455422	0.463783	0.657285
天 津	2016	0.79726	84	396	84	22	19	12036	82.43	134.12	1013.38	397.52	2849.9	35.5687	1361.18	6041	1060.9	16764	1645	269.608	1.44	8	513842	1	158.048	388	0.17144	1077.27	0.127132	0.659426	0.325852
河 北	2016	2.62392	350	1373	712	111	180	46531.68	83.79	580.76	2723.87	5418.56	4610.13	6.69	232.15	12747	6956	188431	474	819.99	3.15	14	1216096	12	184.922	423	0.14294	132.526	0.0309165	0.919413	0.32417
山 西	2016	2.08397	194	778	546	105	131	44330	62.98	300.75	1459.58	4642.21	4227.97	3.2	185.476	12080	5293.4	142066	1245.4	385.604	3.14	4	756287	35	197.818	450	0.0902285	138.867	0.108917	1.68323	0.572542
内蒙古	2016	1.95274	175	956	186	87	120	9627.41	177.91	381.14	1124	1241.1	2635.56	11.3903	176.374	8950	12338.8	196061	956	276.888	4.69	10	436699	11	259.572	369	0.115512	12.1545	0.0220225	0.623144	0.345228
辽 宁	2016	2.31934	349	1258	246	65	125	44873	273.67	454.25	1389.44	565.18	4122.2	17.4141	741.498	10682	5558.9	120613	1445	614.155	2.4	10	998719	9	194.196	387	0.160435	165	0.0993381	0.613138	0.990737
吉 林	2016	1.95636	169	634	54	77	78	16416.8	161.95	203.58	942.831	358.29	2845.94	7.91	120.942	7328	5052.7	102484	582	310.343	3.14	15	642263	8	159.929	226	0.156654	95.6667	0.0352133	0.474906	0.471646
黑龙江	2016	2.53373	198	693	57	176	148	14380	95.7	393.58	2201.42	331.89	1573	4.6	145.402	6048	6233.8	164502	1895	388.997	4.28	23	735857	4	175.482	145	0.151403	27.7174	0.0463981	0.367536	0.278288
上 海	2016	1.10004	227	1261	205	99	24	29621	690.43	230.07	2218.41	1034.41	3728.45	65.3	2198.22	21491	465.1	13292	5381	1074.22	2.57	4	514683	2	422.148	1672	0.388827	3231.03	0.656047	2.10269	0.64515
江 苏	2016	6.83706	561	2241	444	317	113	67780	329.77	651.44	8511.6	4051.15	9952.47	38	2195.83	26034	2767.4	157304	1025	1870.29	3.86	36	1745847	8	470.804	2030	0.215046	857.1	0.266934	0.509879	0.417036
浙 江	2016	5.22849	651	2051	1245	275	102	57300	525.59	1222.64	5956.55	18040.5	7600	74.3	3940.6	20847	2576.9	119053	2628	2367.23	3.5	35	996143	6	544.516	1526	0.22923	563.9	0.0265226	0.550625	0.388476
安 徽	2016	4.45495	312	1070	1879	171	121	52241.2	313.43	542.46	2797.56	32968.5	4763.6	25.42	952.842	12947	4242.6	197588	341	664.45	2.25	22	1145007	11	175.603	1214	0.129889	358.308	0.0795803	0.647977	0.341232
福 建	2016	2.81087	334	844	429	98	97	30864	611.48	260.55	2545.36	2285.87	3495.21	66.26	1736.85	17609	3201	106757	2587.34	889.211	2.15	23	756392	10	215.77	957	0.2012	466.167	0.308208	0.609408	0.270209
江 西	2016	2.9339	290	744	304	138	118	46216.2	164.83	409.09	3391.44	1624.95	4954.48	5.8454	454.949	8569	4010.5	161909	1050	486.86	1.9	28	1038951	14	128.944	346	0.13641	145.688	0.0522233	0.737659	0.562137
山 东	2016	5.28941	622	2115	567	393	157	70716.5	328.82	1183.05	5835.79	4093.49	7399.6	30.6345	341.756	20852	5452.3	265720	3907	1164.99	2.04	35	1995880	7	320.98	2057	0.210736	578.467	0.0802496	1.11948	0.326874
河 南	2016	4.04655	411	1009	1006	270	206	58013	149.93	774.95	4964.14	11994.3	5703.2	8.95	537.063	20407	5570.8	267441	3189	990.893	3.25	39	1874752	17	222.776	1416	0.122019	491.688	0.0380579	0.482567	0.290162
湖 北	2016	3.6086	364	1057	308	183	123	56930.8	337.56	786.45	2671.24	3051.78	4764.18	18.72	556.65	17415	4138.2	260179	1164.73	707.386	2.64	13	1401840	11	290.408	1630	0.149065	282.278	0.114344	0.55606	0.290616
湖 南	2016	2.97584	419	838	452	115	143	59487	240.81	712.08	4783.89	2443.05	4641	3.5	1378.17	15047	4719.8	238273	1091	699.121	2.32	38	1225016	8	241.901	800	0.203674	222.381	0.175326	0.490536	0.282242
广 东	2016	4.15145	723	2028	357	177	146	36200.1	3507.21	865.54	4727.44	2427.28	9200.3	185.77	11833.5	30557	4157.9	218085	10566	3877.56	1.95	37	1892878	7	656.969	2958	0.248002	468.833	0.355323	0.304631	0.479737
广 西	2016	2.55749	410	586	100	125	124	40419	482.52	769.81	1773.49	848.4	4048	23.41	363.192	8883	5192.1	120547	2066	452.657	1.38	4	810282	10	199.327	320	0.133221	85.4783	0.109859	0.839892	0.389811
海 南	2016	1.3447	124	304	74	18	23	5948.7	74.89	69.09	104.028	811.18	610.27	3.5	230.588	4999	1033.4	28217	3189	142.843	2.44	4	184875	1	70.204	51	0.399958	58.8235	0.164302	0.432993	0.194756
重 庆	2016	2.30899	197	546	770	82	41	46535.5	180.89	662.41	2528.17	3080.58	2713.92	16.868	3602	9537	2102.1	142921	2147	428.23	2.43	9	732475	1	204.828	1412	0.217256	420.413	0.0914794	0.762656	0.257418
四 川	2016	4.27144	298	485	621	239	207	63025	308.79	1136.17	5975.94	2303.74	7600.52	15.817	1171.44	25902	4622.7	324138	4609	913.968	2.18	25	1446559	7	403.685	1538	0.161248	93.5208	0.173822	0.511805	0.391045
贵 州	2016	1.61292	266	348	113	73	99	53038.2	72.29	572.31	1653.5	817.44	5011.94	2.527	494.621	10184	3269.5	191626	1873.81	378.917	2.01	8	573932	3	151.128	511	0.105745	120.235	0.0773851	0.593652	0.500801
云 南	2016	2.48985	559	855	221	90	149	42519.3	600.38	651.88	1912.32	3883.17	4536.54	30.75	463.093	9188	3651.5	238052	1183.08	551.025	3.46	3	656594	10	218.728	493	0.149634	58.7895	0.1099	0.926926	0.376261
西 藏	2016	0.758644	68	205	87	7	82	2283.75	32.19	58.2	55.178	390.74	318.802	1.9439	18.3815	635	786.3	82096	423.9	36.0733	2.69	1	35034	1	72.824	12	0.118494	0.708333	0.0491338	2.00553	0.263315
陕 西	2016	2.94814	275	696	281	274	122	44575	338.2	416.32	5337.9	3241.27	3659	23.3855	269.841	15012	4632.6	172471	1002	557.021	4.47	23	1076254	9	216.685	1128	0.140673	176.526	0.10261	0.643271	0.271367
甘 肃	2016	1.81567	299	463	227	152	103	19089.4	7.15	253.7	2317.12	2774.92	1219	0.1914	168.21	6490	4102.1	143039	149	254.238	2.58	12	457204	3	143.17	358	0.134594	28.6923	0.0316252	0.458762	0.206483
青 海	2016	0.707418	76	231	60	23	55	2869.9	7.01	113.94	247.478	284.44	307	0.4416	47.822	1038	2349.2	78585	511	72.0421	3.74	0	61860	1	78.467	53	0.0920284	3.18056	0.0411557	0.484858	0.142969
宁 夏	2016	0.983198	90	115	34	13	26	2457.15	5.12	178.31	188.114	359.92	217.6	0.2968	89.1719	1216	1320.1	33940	313.4	109.925	2.62	0	117149	2	67.681	70	0.107063	42.8788	0.0818877	0.281189	0.108534
新 疆	2016	3.53404	350	415	131	90	119	7901	58.21	579.4	686.32	1190.16	1340	5.1873	309.897	3565	5869	182085	2780	280.35	3.28	3	319875	2	165.558	95	0.125451	5.76875	0.0648188	0.24758	0.229398
北 京	2017	2.41278	496	1396	451	71	19	29353.6	392.56	237.16	1833.29	1100.73	5122.4	51.3	11900	38033	1264.25	22226	8607	1289.9	2.81	16	592878	2	361.972	1299	0.405103	1116.07	0.471806	0.505277	0.687198
天 津	2017	0.777981	80	475	103	62	18	20769	79.21	110.73	1279.37	465.08	3292	37.5147	1762.23	8153	1148.86	16532.1	1863	406.802	1.74	14	514669	1	186.858	351	0.189467	868.182	0.14317	1.19541	0.436171
河 北	2017	3.24013	338	1382	735	122	167	57073.9	91.01	631.33	2991.49	5501.41	6089.6	7.6	1056.06	16939	7162.02	191693	666.8	1365.23	2.95	10	1268873	12	251.894	429	0.15465	132.947	0.0285478	1.14278	0.395839
山 西	2017	2.33611	203	790	665	138	119	56073	67	370.39	2467.54	5692.74	5338.61	3.5	159.331	17361	5316.82	142855	1583.4	656.634	2.09	8	762974	35	222.493	397	0.106264	136.733	0.0729873	2.23175	1.59782
内蒙古	2017	2.27346	242	992	206	93	107	11461.2	184.83	490.23	1240.39	1601.91	3358.59	12.4556	162.729	14817	12674.7	199423	1188	525.492	7.24	6	448092	11	276.846	326	0.120268	11.2273	0.0203646	0.783348	0.45751
辽 宁	2017	2.79928	336	1246	187	65	102	50318	278.85	407.96	1538.48	517.93	4620.7	17.7806	997.987	16513	5914.66	122705	1559	1000.49	1.84	17	980995	8	212.426	343	0.151389	152.6	0.0911162	0.698055	1.1245
吉 林	2017	2.09747	115	615	68	107	65	19092.9	148.43	203.04	1128.4	426.32	3456.5	2.75	136.104	11496	5044.13	103896	699	543.895	2.93	14	643872	7	177.986	223	0.147808	103.389	0.0361016	0.583263	0.567997
黑龙江	2017	2.62613	187	781	71	183	131	16304	103.88	458.76	2331.64	332.64	1877	4.4	1235.76	9667	6232.25	165989	2211	676.726	4.01	19	734166	3	180.777	101	0.149736	25.3913	0.0396493	0.473265	0.319535
上 海	2017	1.10529	223	1382	199	98	24	32845	719.33	439.57	2270.07	968.88	4025.13	68.1	4683.7	23148	465.095	13322	5644	1405.66	2.57	10	514917	2	438.826	1655	0.402121	3224.14	0.60421	2.16755	0.64746
江 苏	2017	7.08435	514	2364	628	322	101	74287.3	370.1	703.62	9108.49	3724.04	11307.5	42	3323.54	29565	2816.44	158475	1169	2947.43	4.02	81	1767877	7	578.084	1853	0.234351	841.1	0.243045	0.588861	0.44131
浙 江	2017	6.03998	585	2216	1410	308	89	62868	589.06	1230.66	6485.45	20973.2	8763.9	43.62	7242.66	27480	2623.97	120101	3040	3522.59	3.23	41	1002346	7	593.47	1579	0.246248	579.1	0.0448703	0.607264	0.422147
安 徽	2017	4.68922	294	1104	2639	196	106	62627	351.09	745.9	3182.88	25330.7	6002.4	28.81	981.938	17570	4274.61	203285	341	1079.78	2.25	20	1147401	11	183.018	1213	0.130481	375	0.0785731	0.911336	0.400265
福 建	2017	2.98657	306	897	426	123	87	37534	691.74	301.89	2933.18	2661.4	4570.77	75.88	1733.2	22664	3191.41	108012	2983.98	1301.81	3.07	31	750987	10	242.92	1021	0.229438	505.75	0.263948	0.747565	0.307075
江 西	2017	3.55279	281	765	425	139	104	57253.5	174.69	480.11	3233.06	3134.12	6392.56	6.2992	1446.12	13490	4280.46	162285	1415	791.13	1.95	16	1048289	14	152.603	447	0.13317	180.875	0.0590941	0.911599	0.663493
山 东	2017	6.07639	586	2220	772	485	139	77966.2	440.52	1352.65	6763.66	4838.18	8491.5	31.7405	331.228	29788	5726.4	270590	4794	1891.88	1.85	9	2015345	7	388.222	1767	0.190532	533.8	0.0759085	1.20073	0.323317
河 南	2017	4.4029	389	974	1671	334	186	66204	155.89	868.5	5542.81	15048	6620.4	9.82	506.005	26516	5414.67	267805	3463	1817.33	3.44	33	2004662	17	251.487	1235	0.123302	461.312	0.0423999	0.580318	0.295961
湖 北	2017	3.66335	364	1067	473	199	112	63499.9	368.14	828.5	3470.85	4150.71	5372.79	21.05	785.59	26058	4215.54	269484	1275.61	1123.38	2.33	16	1400918	11	343.992	1363	0.163401	247.722	0.111724	0.619213	0.30493
湖 南	2017	3.13823	366	885	534	120	127	66330.7	322.28	704.52	5513.15	2488.13	7085.16	6.81	1404.92	23104	4744.52	239724	1241	1121.75	2.01	58	1273208	8	277.967	930	0.207941	246.667	0.168258	0.579911	0.372705
广 东	2017	4.27732	658	2450	390	184	122	47857	3654.52	999.61	5111.7	2350.15	10667.1	199.604	49486.8	37616	4200.7	219580	11420	6105.99	1.93	31	1925775	7	814.335	3143	0.248559	497.444	0.296389	0.374852	0.475563
广 西	2017	3.1201	370	598	108	132	109	51800	512.44	927.29	1827.86	973.2	5418.61	23.96	389.373	13897	5191.39	123259	2478	799.689	1.37	9	866716	9	194.955	344	0.139657	99.4783	0.109144	1.07687	0.455707
海 南	2017	1.35747	120	272	77	19	19	6633.07	111.95	98.26	146.05	940.68	766.77	6.81	339.556	5322	1033.42	30684.3	3463	270.267	2.33	9	185538	1	90.745	52	0.443295	60.5882	0.20342	0.4601	0.206992
重 庆	2017	2.57094	188	559	1283	94	40	53871	224.85	760.48	3095.9	3371	3176.55	19.4759	1654.91	15023	2166.05	147881	2776.16	711.433	2.74	36	746859	1	207.405	1372	0.202398	423.208	0.098981	0.893823	0.294221
四 川	2017	4.77532	323	773	697	255	185	66924	336.17	1111.56	6751.63	2541.14	8825.39	14.4654	2236.95	30198	4831.73	329950	4976	1515.25	2.38	27	1499715	6	413.22	1474	0.143727	90.5417	0.110206	0.61654	0.414769
贵 州	2017	2.17723	232	379	137	84	89	74290.6	32.4	588.76	1851.12	2712.61	7097.91	2.8327	602.898	16207	3284.55	194379	2457.65	889.349	2.88	13	627672	3	193.288	598	0.108195	142.118	0.0851886	0.809589	0.588346
云 南	2017	2.51071	518	900	316	125	132	56672.1	667.69	687.22	2342.31	2483.66	6682.58	35.5	546.13	12834	3681.67	242546	1193.02	1209.71	5.38	10	705854	11	241.003	536	0.157145	58.9737	0.107948	1.28503	0.460267
西 藏	2017	1.14305	70	251	87	7	74	2527.1	34.35	82.03	10.48	428.15	366.3	1.9751	59.0955	977	785.085	89343.3	390.81	48.6495	4.84	0	35643	1	83.889	13	0.129591	0.716667	0.0359231	1.94164	0.253827
陕 西	2017	3.22881	300	737	462	282	111	51901	383.74	484.25	5790.86	4251.64	4603	27.044	664.179	20678	4972.14	174395	1113	952.312	4.98	33	1069374	8	208.454	1241	0.142134	194.053	0.108593	0.770248	0.291556
甘 肃	2017	1.84364	304	504	286	204	86	23889.4	7.88	320.33	2837.18	3378.07	1579	0.2086	193.41	10062	4663.82	142252	156	482.931	2.62	16	466185	3	166.608	362	0.120249	28	0.0330566	0.560475	0.365381
青 海	2017	0.9384	162	284	48	23	46	4684.3	7.02	135.94	150	244.78	379	0.3829	55.7058	2178	2349.49	80895.1	626	167.694	3.65	0	66974	1	88.383	53	0.0879021	3.20833	0.0385562	0.747758	0.152331
宁 夏	2017	0.994881	94	127	45	54	20	3078.5	6.53	174.71	743.12	388.54	275.2	0.386	63.628	1924	1352.1	34561.2	431.5	220.19	2.53	0	121051	2	63.793	67	0.110678	41.3636	0.0727042	0.419992	0.129323
新 疆	2017	3.78844	322	332	127	90	102	10491	77.41	479.86	701.29	1093.75	1751.6	8.1081	581.845	3739	5946.9	185338	3007	365.796	3.04	6	346044	2	169.152	97	0.129539	6.1375	0.0667334	0.390217	0.178182
北 京	2018	2.43159	377	2859	414	82	20	30693.2	400.41	358.7	2374.8	915.34	5556.2	55.2	12671.5	45232	1264.25	22255.8	9123	2153.39	2.83	14	594933	2	348.42	1259	0.453118	1108.33	0.247896	0.527594	0.794017
天 津	2018	0.759686	75	476	121	65	17	22651	58.96	162.23	1400.38	364.34	3841	11.0985	1957.17	12941	1153.43	16256.7	1915	853.159	1.07	17	523349	1	179.249	345	0.179018	797.273	0.19299	1.30141	0.537392
河 北	2018	3.28712	305	1478	450	134	180	67610.7	98.86	901.84	3289.21	3315.62	7580.21	8.49	81.4787	25625	7361.81	193252	759.8	3170.25	3.18	20	1342631	12	270.383	442	0.164459	128	0.02481	1.43011	0.473304
山 西	2018	2.63951	185	890	795	152	130	70378	71.35	579.79	2533	4848.47	6699.46	3.8	176.966	22154	5440.88	143326	1843	1466.99	2.12	20	765580	35	233.5	442	0.109444	133.067	0.0440842	2.95541	1.75943
内蒙古	2018	2.53783	217	1129	226	109	120	12856.1	188.08	580.36	1176.41	1611.41	3924.01	12.721	145.696	15239	12765.8	202641	1340	1315.12	8.15	5	455284	10	278.556	281	0.11413	9.94545	0.0171694	0.983106	0.777673
辽 宁	2018	2.53678	343	1517	192	65	125	56211	287.7	365.29	1703.35	819.02	5254.8	17.3958	3212.41	19975	6524.85	122974	1739	1935.6	1.8	19	963208	8	168.389	304	0.166353	142.933	0.06799	0.791932	1.28268
吉 林	2018	2.14483	100	716	82	107	79	22012.6	143.75	253.73	1040.77	367.45	4165.6	2.52	130.558	10966	5042.99	105399	777	1150.44	3.14	19	658327	7	216.221	174	0.131754	85.0556	0.0308385	0.693336	0.647048
黑龙江	2018	2.77918	173	829	90	191	149	18100	109.16	454.5	2144.4	586.64	2208	3.5	198.894	10285	6894.45	167116	2445	1225.27	4.08	25	732082	3	165.654	80	0.135079	24.1957	0.0359736	0.576827	0.414579
上 海	2018	1.19994	203	1691	254	100	25	33977	742.04	442.47	2583.8	1097.41	4477	73.7	3593.36	29873	466.073	13106.4	5921	2256.96	2.5	3	517796	2	478.666	1626	0.395669	3317.24	0.498424	2.19122	0.697815
江 苏	2018	7.18955	481	2835	662	329	115	81422.8	400.85	810.52	9518.83	3546.37	12851.3	46.5	2904.53	35337	3061.77	158729	1272	5864.89	4.13	50	1806277	7	620.416	1848	0.231721	858.5	0.194656	0.678404	0.483406
浙 江	2018	6.64742	548	2686	1573	337	101	68386	456.76	1484.14	7005.39	20787.6	9833.98	33.9	6120.56	35246	2813.47	120662	3375	6427.56	3.17	32	1019449	7	668.737	1659	0.240818	580.8	0.0676659	0.699763	0.411511
安 徽	2018	4.81913	278	1436	2859	201	122	72147.2	370.75	906.03	3025.65	19959.9	7030	31.88	1268.18	23158	4324.21	208826	343	2577.7	2.38	26	1139112	11	198.574	1252	0.13363	384.615	0.0615378	1.14478	0.442902
福 建	2018	3.15063	301	1128	454	128	97	45139	513.55	290.73	3715.38	3403.68	6032.95	90.92	2390.68	25226	3513.74	108901	3329.82	2525.27	3.68	30	772361	10	280.744	1092	0.248914	534.167	0.191041	0.949016	0.369402
江 西	2018	4.01045	279	882	379	144	118	68550.4	191.78	641.71	3696.99	2326.36	8095.79	7.4538	286.789	16878	4278.44	161941	1734	1785.82	2.15	27	1054400	14	159.461	540	0.130821	195.875	0.0596355	1.13276	0.770465
山 东	2018	6.41941	544	2511	828	517	157	85899.3	422	1812.59	7232.62	5255.57	9661.5	33.642	674.997	37969	6335.89	275642	4500	4187.58	1.92	31	2040793	7	423.072	1609	0.155505	493.6	0.0666326	1.27991	0.214789
河 南	2018	4.77456	371	1147	2017	334	204	78261	167.25	1126.65	6040.11	15348.6	8051.81	10.34	493.996	29628	5409.66	268589	3911	4387.02	3.92	36	2140780	17	277.635	983	0.096677	375.75	0.0387213	0.710266	0.321869
湖 北	2018	4.02079	353	1229	489	200	125	72253.6	405.11	843.85	3922.46	4425.56	6186.88	23.8	1532.28	25190	4340.55	275039	1382	2385.27	2.45	13	1438242	11	421.351	1479	0.153988	272.444	0.0956714	0.738777	0.32065
湖 南	2018	3.30174	304	1055	510	121	145	75010.4	365.08	785.86	5444.09	2247.77	8255.12	7.71	1780.69	26657	5070.1	240060	1403	2725.34	2.5	28	1326828	8	313.189	1101	0.185859	280.143	0.143051	0.706559	0.426924
广 东	2018	4.67238	598	3045	436	184	145	45252.8	3748.06	1738.92	5511.98	2522.27	12253.3	205.12	12828.4	41276	4524.17	217699	12931	11014.2	1.87	79	1963170	7	994.681	3491	0.243068	456.889	0.240314	0.344726	0.470467
广 西	2018	3.81079	386	819	112	131	124	67800	562.33	899.52	1753.65	1118.19	7436.08	27.78	444.859	17920	5202.24	125449	2766	2180.43	1.4	16	942227	9	209.235	362	0.134331	104.435	0.0807946	1.42627	0.708676
海 南	2018	1.35348	114	440	82	19	23	7501.04	126.36	153.96	234.46	715.56	898.14	7.71	514.876	9670	1033.42	35022.7	3911	591.081	2.69	12	189179	1	71.151	55	0.477344	60.5882	0.139302	0.530311	0.282961
重 庆	2018	2.65811	178	613	1571	100	41	51381	279.98	559.99	3687.1	5142.8	4370.58	21.8989	855.123	20263	2326.44	157483	3046.76	1678.35	2.81	36	762811	1	212.048	1224	0.193275	389.186	0.0999886	0.852668	0.360423
四 川	2018	5.1921	329	1148	829	252	207	70198.4	369.82	1242.32	7189.09	2339.61	10012.7	15.1165	2034.87	34678	4950.22	331592	5484.3	3645.6	2.36	43	1564710	6	430.242	1544	0.150219	91.3542	0.0749862	0.715929	0.417098
贵 州	2018	2.75734	221	532	153	91	99	96712	39.69	710.47	1973.75	1231.35	9449.58	3.1763	633.147	13133	3564.7	196908	2799.51	2256.44	2.86	21	687530	3	177.391	611	0.104261	144.176	0.0727601	1.04006	0.687418
云 南	2018	2.53801	458	1185	268	137	149	68141.7	706.08	864.98	2322.63	2569.95	8698.97	44.18	378.115	17113	3847.89	252929	1348.16	2569.16	6.4	13	764659	11	299.68	611	0.1478	60.8158	0.0847685	1.65961	0.540552
西 藏	2018	1.14203	85	310	86	7	82	3321.1	47.62	101.74	19.97	440.17	487.7	2.4709	79.7538	2235	785.085	97785	475.32	116.679	3.94	0	35717	1	100.867	10	0.126761	0.75	0.0260376	2.40714	0.310844
陕 西	2018	3.55064	304	819	531	294	123	62588	437.14	579.45	6713.38	4937.69	5789	31.2642	468.759	22499	5001.53	177128	1190	2354.79	5.28	30	1054808	8	219.126	1282	0.145359	212.211	0.109511	0.880449	0.330676
甘 肃	2018	2.01281	307	678	351	215	103	30190.9	10.01	414.36	2915.33	3258.8	2058	0.282974	182.954	12921	4671.74	143228	168	1225.25	3.1	23	483620	3	180.01	348	0.107649	24.1282	0.0279598	0.715907	0.433852
青 海	2018	0.941025	162	491	84	24	55	3710.8	6.92	133.46	188.98	423.8	464	0.3613	65.9677	3944	2349.05	82137.1	715	429.96	3.69	1	70288	1	83.738	48	0.0862745	3.29167	0.0256863	0.577041	0.177826
宁 夏	2018	1.03015	83	161	75	54	27	3335.9	8.82	186.44	724.24	279.89	291.9	0.5587	61.6502	3492	1373.05	35405.2	458.8	480.715	2.65	2	125253	2	69.172	62	0.119403	40.4545	0.0562321	0.54502	0.179074
新 疆	2018	3.95544	300	574	134	91	119	15025	99.3	364.02	679.98	1061.97	2522.9	9.4637	714.859	7614	5959.39	189050	3368	894.205	3.03	7	374944	2	169.293	94	0.138545	5.98125	0.0317908	0.713268	0.45001
北 京	2019	2.55271	439	3062	370	81	20	31800	376.9	698.59	2488.84	803.4	5866.2	51.9	18848.8	42046	1366.96	22365.9	9241	3142.09	3.24	29	601545	2	474.695	2076	0.364328	1489.29	0.249066	0.510934	0.854381
天 津	2019	0.74151	71	502	151	68	17	24497	56.1	182.37	1486.9	395.87	4235	11.8254	4831.91	11025	1185.27	16131.9	2069	1343.4	1.16	8	539366	1	170.602	483	0.148284	922.727	0.247192	1.38884	0.529979
河 北	2019	3.58715	320	1513	749	136	180	78078.9	97.08	1137.93	3407.05	6854.1	9248.69	9.36	237.93	24245	7791.29	196983	790.3	5299.32	3.04	23	1473971	12	297.965	468	0.171	134.368	0.0225259	1.7476	0.520037
山 西	2019	2.69909	190	927	779	158	130	83390	76.22	664.47	2460.78	5209.93	7999.35	2.05086	170.691	20537	5890.41	144283	2037.1	2491.54	2.19	22	802005	36	282.299	471	0.115745	137.867	0.0287999	3.74197	1.88411
内蒙古	2019	2.77278	205	1147	264	125	120	19316.7	195.83	591.54	1483.99	2237.97	4558.52	13.4009	460.272	12219	13016.4	206089	1443	2126.17	7.82	9	472033	9	285.708	239	0.113314	9.87273	0.0162162	1.60492	0.85557
辽 宁	2019	3.1893	304	1524	238	65	124	63876	294.14	338.73	2240.85	835.96	6102.7	17.4	342.624	19666	6512.13	124767	1711	2925.91	2.02	17	1041144	6	206.02	340	0.145904	148.4	0.0614841	0.913246	1.44877
吉 林	2019	2.30773	94	701	95	107	79	24696.4	136.58	246.33	1120.74	348.13	4877.89	2.65	195.744	12017	5042.99	106660	830	1863.86	3.62	22	700145	6	260.153	166	0.136469	65.6667	0.0313252	0.785883	0.79336
黑龙江	2019	2.84492	155	837	87	193	150	21555	110.69	442.17	2217.89	416.8	2604	6.46	166.301	10034	6780.95	168710	2509	1847.13	4.29	20	778160	3	192.592	87	0.119148	25.587	0.0343136	0.728231	0.45953
上 海	2019	1.21924	190	1758	311	98	24	36141	734.69	451.36	2768.05	1224.86	4789.3	83.76	12855.8	27729	466.537	13044.6	6121	3010.47	2.56	12	526585	2	629.48	2231	0.331437	4475.86	0.483916	2.24273	0.719164
江 苏	2019	7.40772	408	2943	626	345	115	87611.7	399.46	833.87	10034.1	4683.4	13902.2	47.4	1614.86	35545	3586.8	159937	1364	8972.34	4.14	91	1874084	7	720.52	2030	0.200073	882.4	0.180101	0.731609	0.491635
浙 江	2019	6.87391	528	2769	1550	366	101	72180	467.11	2352.01	8029.65	18261.2	10727	26.68	6660.02	35273	2842.16	121813	3600	9894.69	3.02	41	1074688	7	798.956	1957	0.220076	628.5	0.119977	0.712975	0.406827
安 徽	2019	4.77791	268	1487	2628	219	123	81955	379.74	991.8	2979.14	13398.3	8291.5	33.88	3022.31	21822	4843.93	218295	360	4447.48	2.6	30	1241151	11	218.762	1271	0.144097	395.462	0.0605395	1.38903	0.471497
福 建	2019	3.24283	290	1181	455	130	97	52697	566.03	345.06	4166.85	4295	7393	102.43	1477.34	24747	3513.76	109785	3618.06	3881.46	4.18	23	861231	10	305.916	1272	0.24446	597.333	0.166078	1.16394	0.438776
江 西	2019	4.29408	310	909	337	143	118	79078.3	197.17	661.3	3791.9	3124.5	9596.67	8.6538	1185.28	17250	4904.98	209131	1846	3068.68	3.02	36	1134950	14	234.405	635	0.123631	215.375	0.0673252	1.3652	0.836464
山 东	2019	6.51272	502	2613	1306	541	157	93288	404.22	1924.73	7658.29	7055.94	10851.3	34.1314	1132.69	36606	6633.01	280325	5881	6504.37	1.93	30	2183944	7	451.91	1377	0.157001	364.8	0.0635746	1.35943	0.225405
河 南	2019	5.02154	361	1156	2221	340	205	89803	180.35	1273.55	6429.16	20174.1	9516.96	13.04	1104.71	30516	6466.94	269832	3901	6589.57	4.1	48	2319653	17	318.108	1133	0.0969489	416.062	0.0413184	0.823291	0.349362
湖 北	2019	4.2729	330	1267	388	213	124	60144	450.02	754.12	4109.97	6048.52	6743.99	26.54	2756.53	25470	5164.85	289029	1494.37	3829.34	2.5	27	1500819	11	410.234	1494	0.147139	278.778	0.0915335	0.693041	0.308746
湖 南	2019	3.73079	302	1143	575	117	146	81676.1	466.95	700.64	6411.77	2640.25	9613.37	9.72	2283.36	25046	5578.81	240566	1542	4570.61	2.41	71	1407108	8	354.322	1250	0.168335	314.095	0.133821	0.809862	0.466161
广 东	2019	4.93572	586	3281	397	241	145	49409.6	3731.39	2270.16	6860.85	2600.8	13740	205.21	26160.3	41161	4719.68	220290	13931	16449.8	1.85	97	2053977	7	1023.41	4393	0.205148	485.833	0.224748	0.373375	0.463675
广 西	2019	4.3545	383	850	95	131	124	87000	623.96	932.99	1993.84	1039.07	9998.82	35.11	400.692	19178	5206.43	127819	2904	3747.19	1.46	54	1076408	9	251.94	415	0.127321	112.609	0.0789247	1.86096	0.850436
海 南	2019	1.38452	101	483	111	27	23	8167.61	143.59	144.66	359.37	1096.23	991.81	9.72	402.889	8738	1033.42	38106.8	3901	899.358	3.01	12	207424	1	84.248	71	0.397877	101.471	0.140576	0.585852	0.357567
重 庆	2019	2.95516	159	673	1646	104	41	67190	297.11	841.51	3793.43	2976.14	5564.61	25.2483	821.739	20181	2359.07	174284	3505.9	2769.31	2.99	38	834864	1	241.452	1159	0.192006	396.233	0.100889	1.12192	0.456088
四 川	2019	5.86598	370	1242	732	256	207	75081.6	414.78	1080.14	7219.11	2642.31	11454.5	20.2379	2851.84	38382	5241.86	337095	6386	5612.71	2.53	41	1661737	6	472.219	1672	0.143517	96.0625	0.0700389	0.823581	0.434334
贵 州	2019	3.17274	225	594	158	91	99	113365	47.18	646.45	1845.78	1126.57	12296	3.4503	884.905	13105	3753.19	204723	3030.88	3950.77	2.8	39	765745	3	185.675	607	0.102719	140.706	0.0781272	1.20965	0.92177
云 南	2019	2.92361	415	1105	304	140	149	79977.8	739.02	957.49	2407.49	3539.4	10679.5	51.47	448.126	19061	4053	262409	1472.33	4303.54	4.59	12	864035	10	388.802	633	0.137081	61.0526	0.0939906	2.10306	0.620019
西 藏	2019	1.221	165	310	85	7	82	3958	54.19	118.79	16.75	549.07	540.4	2.7907	101.721	1373	785.085	103951	528.46	306.167	6.34	0	36226	1	102.479	13	0.113191	1.025	0.0233085	2.93982	0.351042
陕 西	2019	3.80645	287	862	516	294	122	70249	465.72	554.16	6792.66	4719.86	6979	33.6765	302.453	23633	5419.21	180070	1558	3560.03	4.9	35	1121990	8	245.213	1372	0.136265	230.842	0.116602	0.99935	0.399402
甘 肃	2019	1.16195	315	723	343	224	103	37423	19.82	438.44	3325.31	2648.21	2676	0.590466	220.344	14332	4829.66	151443	188	1997.51	3.05	16	524948	3	204.94	347	0.10531	24.8718	0.0298333	0.888676	0.584888
青 海	2019	1.87812	207	515	100	24	55	5243.6	7.31	173.72	232.27	213.28	559	0.3336	53.0914	3386	2449.28	83760.6	813	645.078	3.65	2	73182	1	125.985	58	0.083854	3.91667	0.0282063	0.831789	0.219471
宁 夏	2019	1.09887	89	164	30	55	27	3998.5	12.66	230.79	852.23	300.18	335.6	0.6478	46.5897	3859	1552.94	36575.7	521	763.907	2.99	3	135178	2	82.222	72	0.128774	45	0.0541269	0.697119	0.243409
新 疆	2019	4.37118	297	540	132	90	119	21151	34.67	376.59	696.81	1265.01	3593	4.54	263.751	9601	6935.38	194222	3758	2049.03	2.74	3	426966	2	193.045	126	0.137437	7.09375	0.0278324	1.04484	0.632682
北 京	2020	2.52483	362	3194	393	80	20	18400	34.1	184.76	818.53	2642.1	2880.9	4.8	39579.8	37871	1404	22264	5339	3727.87	3.22	9	608866	2	463.029	2009	0.220189	1529.17	0.0540278	0.595879	0.396012
天 津	2020	0.750568	69	516	113	71	17	14100	17.13	55.86	521.25	778.7	1331.42	3.34	6303.41	9214	1186	16411	1046	1779.14	3.63	1	572152	1	133.272	515	0.0936508	959.091	0.205362	1.33155	0.162395
河 北	2020	4.07235	285	1531	770	148	180	37952.5	7.9	753.17	897.31	3341.5	3674.7	0.29575	128.256	24104	7941	204737	730.477	6825.41	3.39	10	1604798	12	353.883	499	0.121161	144.895	0.00545288	2.14745	0.185455
山 西	2020	3.01085	179	945	827	159	130	33000	1.7	408.57	1310.49	3589.1	2919.7	0.06051	141.081	19936	6251	144323	1299	3242.42	2.49	15	841986	34	274.503	603	0.0905618	162.667	0.00832362	2.64925	0.650917
内蒙古	2020	2.82257	191	1159	204	172	120	12494	8.7	402.68	788.69	1043.3	2404.06	0.3401	67.2339	12184	14190	210217	873	2648.41	7.85	9	486647	9	295.807	227	0.0890675	9.47273	0.00383686	1.917	0.4634
辽 宁	2020	3.43704	293	1530	186	65	123	30150.2	19.8	308.78	678.6	473.6	2712.2	1.2	231.094	18162	6627	130899	939	3667.28	2.07	11	1140799	6	179.199	347	0.0944444	146.467	0.00103611	0.89955	0.603791
吉 林	2020	2.39422	91	696	104	107	79	15321.4	20.83	107.99	332.51	368.5	2528.1	0.97	103.771	10578	5043	107848	529	2242.09	3.55	10	726957	6	207.929	155	0.0969543	64.5556	0.0039614	1.00224	0.381584
黑龙江	2020	2.84802	149	824	82	191	142	14272	16.5	230.28	2675.36	143.2	1644.4	1.59	110.666	10641	6781	168119	1645	2235.84	4.27	14	825601	3	210.064	86	0.0828729	28.1522	0.00796881	1.16195	0.276853
上 海	2020	1.30246	188	1808	315	107	24	23605.7	128.62	322.43	1235.93	559.1	2809.5	37.74	9374.29	24983	491	12917	3021	3672.33	2.34	4	540693	2	483.672	2508	0.20462	4875.86	0.116292	2.57032	0.387042
江 苏	2020	7.63234	376	3057	620	367	116	47000	77.03	636.67	5396.45	3114.9	8136.3	16.6	1655.56	33858	4174	158101	900	10888.2	4.23	26	2014698	6	860.604	2510	0.151101	994.6	0.0395713	0.551835	0.272074
浙 江	2020	7.18244	500	2885	1236	406	102	57000	38.3	1851.15	3076.53	6966.4	8264	1.6367	6549.37	32720	3159	123080	2523	12620.9	3.05	33	1148737	4	850.347	2163	0.174121	610.6	0.0478101	0.982149	0.279729
安 徽	2020	5.11588	245	1522	2334	230	123	47000	69.3	706.92	1453.97	9555.1	4221.5	2.7	791.005	21652	5287	236483	229	5662.02	2.68	6	1368465	10	225.055	1359	0.113547	391.308	0.0282638	1.45428	0.216542
福 建	2020	3.51995	279	1270	558	132	98	36981.1	229.67	283.27	1193.74	3372	4927.72	20.69	1575.76	21713	3779	110118	2326.77	4764.94	4.57	5	947187	9	335.728	1411	0.175888	606.25	0.0339391	1.60647	0.276558
江 西	2020	4.73427	293	974	380	172	120	55681.8	12.9658	409.62	3238.67	1905	5420.1	0.373891	271.143	15572	4917	210641	1273	3849.22	3.27	15	1241984	13	230.014	796	0.0984962	241.5	0.0197835	1.32882	0.435847
山 东	2020	6.7168	454	2676	1566	577	158	57669.6	52.8	1659.98	3525.13	15084.7	6005.3	2.09	816.496	36696	6924	286814	3234	8192.52	2.01	18	2291483	5	503.101	1627	0.117751	386.867	0.00937689	1.87672	0.118128
河 南	2020	5.29882	344	1166	2391	336	205	55064.4	108.21	812.57	3191.01	12351.5	4812.85	7.82	518.711	31509	6519	270271	1801	8986.43	4.06	22	2492185	16	332.758	1184	0.0810939	440.438	0.0107043	0.952746	0.167163
湖 北	2020	4.68276	312	1310	441	214	125	43694	35.2119	400.59	1380.29	6067.2	4365.89	2.075	2608.34	21797	5185	289612	788.404	4676.94	2.71	6	1616873	9	432.862	1421	0.103426	287.222	0.0314212	1.45222	0.23072
湖 南	2020	4.11934	272	1315	631	122	146	64326.8	17.0404	602.21	3394.24	3231	8258.42	0.51	3417.63	24826	5646	241138	1136	6100.47	2.49	19	1510332	7	347.866	1493	0.135209	343.667	0.0402091	1.14133	0.371139
广 东	2020	5.36342	551	3390	475	296	144	22600	421.86	997.15	2494.08	1689.9	4528.31	23.53	20638	39028	4871	221873	8878	20833.1	1.94	20	2400227	7	1107.24	4868	0.142224	486.056	0.0602104	0.290127	0.131275
广 西	2020	4.89433	381	922	78	142	125	66100	24.6815	572.68	1241.8	505.6	7262	1	347.469	19152	5206	131642	1808	5042.16	1.52	24	1184167	9	322.285	531	0.0954944	117.261	0.0184309	1.89214	0.588193
海 南	2020	1.42083	98	600	102	35	23	6432.68	22.4	97.41	181.39	884.2	872.86	1.12	520.318	7848	1033	40163	1801	1177.98	3.68	3	230062	1	82.829	98	0.309593	127.647	0.0561399	0.814418	0.28127
重 庆	2020	3.31069	151	710	1265	105	41	43337.6	14.63	596.84	1751.45	1734.07	4001	1.0792	869.575	16649	2356	180796	2593.28	3392.33	2.98	20	915556	1	230.72	1181	0.150187	417.375	0.123801	1.16522	0.0719853
四 川	2020	6.49994	366	1336	725	258	207	45107.4	414.78	527.21	3753.36	1431.3	7170.07	4.6791	878.622	38379	5312	394371	4316	8064.43	2.68	18	1800903	5	520.403	1795	0.108267	104.958	0.0166577	0.79158	0.248125
贵 州	2020	3.51644	217	671	200	92	99	61777.1	4.36	1342.87	1904.31	580.7	5783.64	0.21108	552.134	12824	3873	206693	2253.16	5163.31	2.92	29	840249	3	246.931	645	0.0910891	139.118	0.0251123	1.53927	0.434972
云 南	2020	3.44843	389	1147	270	161	149	52887.1	148.69	501.03	937.21	1598.1	6449.21	4.03	341.319	18518	4220	292479	956.5	5805.94	5.02	6	964205	9	353.527	770	0.0958495	61.3684	0.031953	2.19365	0.342346
西 藏	2020	1.45605	161	310	87	8	82	3504.67	0.34	136.19	18.44	365.7	366.21	0.0302	109.158	1150	785	118238	390.96	434.08	7.77	1	38556	1	112.986	17	0.0945652	1.29167	0.0161855	4.2485	0.230451
陕 西	2020	4.2133	269	903	591	309	122	35701	8.5901	387.81	2242.09	3174.2	2762	0.4548	317.43	21294	5589	180660	996	4385.51	4.86	9	1210048	6	265.389	1419	0.105219	246.684	0.0381952	0.970422	0.144921
甘 肃	2020	2.4518	304	796	347	226	104	21288	2.5446	314.81	1748.66	1681.2	1454.4	0.0696	166.253	14446	5113	155957	144	2604.77	3.26	8	581062	3	184.417	368	0.0885645	27.3333	0.0145308	0.797817	0.294338
青 海	2020	1.23493	178	527	122	24	54	3311.3	0.5	242.32	118.48	173.6	289.79	0.018438	29.7353	4184	2975	85131	675	837.13	3.44	1	74111	1	114.591	56	0.0672131	3.58333	0.0111578	0.800919	0.127939
宁 夏	2020	1.14939	82	173	30	54	27	3428.43	1.1089	178.68	335.47	135.1	198.8	0.0386	22.2032	4074	1663	36901	347.7	949.32	2.99	0	146679	2	94.306	59	0.0890411	44.2424	0.0173594	0.963354	0.000755908
新 疆	2020	4.60965	346	657	124	81	116	15805	6.1	176.26	202.59	332.3	991.03	0.1576	56.714	8742	7831	209220	1894	3138.02	2.67	4	486680	2	275.083	181	0.0915068	8.73125	0.00391738	2.27171	0.145757

## Sheet: 影响因素
		U-出行系统	U-资源密度	U-服务能力	U-经济水平	铁路密度	公路里程	航空运输量	人文资源密度	自然资源密度	餐饮业支撑能力	住宿业支撑能力	零售业支撑能力	文化娱乐人均消费支出	GDP增长率
地区	年份	0.396487	0.544045	0.396769	0.624925	X11	X12	X13	X21	X22	X31	X32	X33	X41	X42		变量名	样本量	最大值	最小值	平均值	标准差	中位数	方差	峰度	偏度	变异系数（CV）
北 京	2010	0.205994	0.155387	0.134456	0.434361	1200	21114	5630	108.929	12.5	2137	0.245327	1797.02	1873	10.4		X11	341	1078.18	4.167	269.442	215.27	230.994	46341.1	3.149	1.771	0.798947
天 津	2010	0.148247	0.0900113	0.0531452	0.236574	800	14832	396	31.8182	3.63636	391	0.150039	699.091	1147	14.4		X12	341	394371	11974	147438	79132.3	151986	6.26192e+09	-0.452	0.067	0.536715
河 北	2010	0.15231	0.116656	0.0621663	0.258225	4900	154344	156.8	16.3684	2.52632	358	0.136541	78	580.5	9.2		X13	341	13931	85	1978.12	2207.57	1213	4.87336e+06	6.975	2.45	1.11599
山 西	2010	0.110994	0.0083179	0.045138	0.388107	3800	131644	642.99	27.7333	2.2	490	0.136035	93.6	621.9	10.8		X21	341	236.207	0.833	26.324	38.603	15.353	1490.2	9.594	3.044	1.46646
内蒙古	2010	0.148789	0.079583	0.089726	0.297075	8900	157994	377	1.28182	0.490909	454	0.122677	7.52727	996.2	14.1		X22	341	17.241	0.117	4.46	3.757	3.588	14.113	2.795	1.616	0.842338
辽 宁	2010	0.108831	0.0585875	0.0342564	0.243594	4300	101545	754	7.93333	3.26667	666	0.163317	162.2	763.6	10.3		X31	341	4868	6	844.941	788.902	534	622367	2.718	1.404	0.933677
吉 林	2010	0.137004	0.0348183	0.0325458	0.21961	4000	90437	296	3.83333	2.77778	209	0.118129	43.2222	580.3	10.4		X32	341	0.477	0.067	0.169	0.074	0.146	0.006	3.15	1.764	0.438626
黑龙江	2010	0.312544	0.6371	0.468293	0.71885	5800	151945	851	1.21739	1.91304	237	0.117209	18.7826	473	11.7		X33	341	4875.86	0.383	353.952	646.482	136.733	417939	18.414	3.965	1.82647
上 海	2010	0.139526	0.152941	0.187302	0.469908	400	11974	3642	110.345	17.2414	1279	0.381929	2389.66	2195.4	10.2		X41	341	3008.5	70.5	810.31	500.24	663	250240	4.609	2.045	0.617344
江 苏	2010	0.152908	0.237218	0.144372	0.480085	1900	150307	476	26	4.4	1555	0.205529	440.6	1301.5	12.7		X42	341	17.2	-5.4	8.339	3.162	8.1	9.998	0.827	-0.244	0.379173
浙 江	2010	0.138098	0.116399	0.0683651	0.326365	1800	110177	1520	31.8	8	1003	0.223278	286.7	1352	11.9		D	341	0.859	0.113	0.444	0.157	0.445	0.025	-0.334	0.086	0.353095
安 徽	2010	0.135126	0.134879	0.0874463	0.441352	2900	149382	208	10.9231	4.76923	593	0.127731	121.769	782.9	14.3
福 建	2010	0.119653	0.114103	0.0401891	0.301941	2100	91015	1356.1	18	4.66667	552	0.18071	145.25	1180.7	13.9		Kendall's W分析结果
江 西	2010	0.22543	0.159618	0.263075	0.306987	2800	140597	186	8.625	5	353	0.111259	46.125	706.1	14		名称	秩平均值	中位数	Kendall's W系数	X²	P
山 东	2010	0.249275	0.138605	0.122959	0.302738	3800	229859	1175.89	15.7333	6.33333	3133	0.165396	459.667	795.2	10.4		D	2.029	0.445	0.948	3232.65	0.000***
河 南	2010	0.184711	0.0746846	0.0825907	0.291262	4300	245089	1489	18.75	4.75	1373	0.107083	275.938	740.8	12.4		X11	6.85	230.994
湖 北	2010	0.183066	0.0914091	0.070681	0.337132	3400	206211	885.4	9.77778	2.72222	882	0.120816	126.889	655.9	14.7		X12	11	151986
湖 南	2010	0.410977	0.0741989	0.220137	0.542209	3700	227998	606	6.95238	4.04762	534	0.156396	84.9048	813.4	14.6		X13	9.463	1213
广 东	2010	0.12579	0.0302911	0.0332059	0.312886	2700	190144	7628	11.0556	2.5	2292	0.245984	256.278	1550.6	12.5		X21	4.672	15.353
广 西	2010	0.110043	0.107433	0.0782631	0.259727	3200	101782	1201	3.6087	1.30435	192	0.121309	33.087	789.2	11.7		X22	3.158	3.588
海 南	2010	0.125542	0.102194	0.0893486	0.388518	700	21236	1489	15.8824	3.52941	101	0.246504	85.5882	523	16		X31	8.305	534
重 庆	2010	0.233686	0.0364369	0.0795598	0.333061	1400	116949	739	7.77643	4.49575	554	0.1838	151.154	935.6	17.2		X32	1.041	0.146
四 川	2010	0.126817	0.0786722	0.017761	0.310909	3500	266082	2182	5.95833	1.27083	878	0.143069	38.8958	789.6	15.1		X33	6.39	136.733
贵 州	2010	0.148696	0.0374814	0.0309966	0.287575	2000	151644	637.59	9.35294	3	134	0.0877308	29.0588	760.5	12.8		X41	8.815	663
云 南	2010	0.0292255	2.16482e-06	0.0107742	0.166129	2500	209231	753.75	4.65789	1.52632	180	0.119724	24.8684	691.4	12.3		X42	4.276	8.1
西 藏	2010	0.156032	0.0805329	0.0693377	0.34197	500	60810	154.04	0.833333	0.116667	6	0.09792	0.383333	279.7	12.3		注：***、**、*分别代表1%、5%、10%的显著性水平
陕 西	2010	0.0743424	0.0263385	0.0237444	0.275157	4100	147461	783	11.3684	2.78947	678	0.137894	61.1579	843.8	13.9
甘 肃	2010	0.033399	0.00352564	0.0122093	0.254212	2400	118879	100	3.71795	1.07692	206	0.0995404	11.2821	659.3	11.8		变量名	样本量	最大值	最小值	平均值	标准差	中位数	方差	峰度	偏度	变异系数（CV）
青 海	2010	0.0552561	0.036074	0.0228209	0.321322	1900	62185	85	1.09722	0.263889	34	0.0972518	1.34722	558.3	13.3		U-出行系统	341	0.687	0.029	0.214	0.114	0.192	0.013	1.813	1.214	0.531383
宁 夏	2010	0.0976925	0.0027593	0.0283833	0.24439	1200	22518	141.2	4.24242	1.51515	88	0.1087	31.3636	801.8	12.5		U-资源密度	341	1	0	0.155	0.175	0.114	0.031	7.228	2.592	1.12994
新 疆	2010	0.413723	0.569789	0.398905	0.688821	4200	152843	490	0.9625	0.24375	53	0.139956	2.8875	579	10.6		U-服务能力	341	0.774	0.003	0.125	0.122	0.09	0.015	7.008	2.342	0.98058
北 京	2011	0.233329	0.168493	0.154506	0.483978	1200	21347	6100	117.857	12.5	2091	0.289256	1708.33	2135.6	8.1		U-经济水平	341	0.94	0.103	0.299	0.149	0.255	0.022	4.024	1.906	0.497701
天 津	2011	0.156547	0.0922876	0.0678937	0.272562	900	15163	475	36.3636	3.63636	414	0.173059	788.182	1335.2	13.4
河 北	2011	0.15739	0.125114	0.0722889	0.275512	5200	156965	229.6	17.1579	2.52632	411	0.166667	88.5789	680.5	10.3
山 西	2011	0.116276	0.00902604	0.0508439	0.407429	3800	134808	735	30.6667	2.2	498	0.16075	102.2	696.5	10
内蒙古	2011	0.150001	0.0809285	0.100581	0.323919	9200	160995	457	1.40909	0.509091	430	0.14247	8.48182	1071.7	13.6		Kendall's W分析结果
辽 宁	2011	0.110098	0.0624345	0.043508	0.288107	4300	104026	750	8.4	3.26667	684	0.187097	175	856.6	10.2		名称	秩平均值	中位数	Kendall's W系数	X²	P
吉 林	2011	0.142201	0.0368261	0.0382556	0.250054	4000	91754	311	4.44444	2.88889	163	0.1505	47.2222	729.2	10.5		D	5.663	0.445	0.957	4566.8	0.000***
黑龙江	2011	0.363162	0.731553	0.503866	0.785931	5900	155592	923	1.34783	2	251	0.130769	20.3696	592.2	10.9		U-出行系统	3.73	0.192
上 海	2011	0.156816	0.164768	0.209587	0.574452	500	12084	3766	143.103	17.2414	1519	0.301389	2808.62	2460.8	8.3		U-资源密度	2.235	0.114
江 苏	2011	0.155967	0.256971	0.165475	0.501768	2400	152247	555	28.8	4.6	1719	0.227447	486.5	1689.9	11		U-服务能力	1.754	0.09
浙 江	2011	0.142509	0.123834	0.0881607	0.342148	1800	111776	1580	38	8.1	1186	0.238871	332.4	1483.5	9		U-经济水平	4.845	0.255
安 徽	2011	0.142231	0.142572	0.102683	0.452326	3100	149535	214	12	5	729	0.146405	169.308	854.4	13.4		X11	10.85	230.994
福 建	2011	0.123755	0.119604	0.0425386	0.325688	2100	92322	1531.65	19.5833	4.83333	630	0.198515	184.167	1249.9	12.3		X12	15	151986
江 西	2011	0.239183	0.179915	0.235137	0.334243	2800	146632	208	9.3125	5.1875	251	0.131183	54.75	818.6	12.4		X13	13.463	1213
山 东	2011	0.258213	0.144466	0.131186	0.326485	4200	233190	1308	18	7.06667	2451	0.195634	453.933	881.6	10.7		X21	8.672	15.353
河 南	2011	0.189346	0.0797317	0.0984652	0.329876	4300	247587	1697	19.5625	4.9375	1410	0.128332	265.5	829.3	12		X22	7.141	3.588
湖 北	2011	0.18747	0.0962844	0.0819515	0.351824	3400	212747	914.52	11.1667	2.77778	930	0.152381	144.944	798.8	14.1		X31	12.305	534
湖 南	2011	0.425628	0.080207	0.234272	0.578288	3700	232190	664	8.33333	4.09524	471	0.195253	94.6667	899.2	12.8		X32	2.874	0.146
广 东	2011	0.132222	0.0322352	0.0414528	0.356426	2800	190724	7981	12.7778	2.55556	2388	0.261121	285.5	1718.9	10.2		X33	10.39	136.733
广 西	2011	0.118534	0.112521	0.108198	0.25315	3200	104889	1331	4	1.34783	237	0.134118	43.6522	940.8	11.5		X41	12.815	663
海 南	2011	0.139638	0.107978	0.116309	0.407162	700	22916	1697	17.6471	3.52941	94	0.333916	83.5294	576.7	12.2		X42	8.264	8.1
重 庆	2011	0.254122	0.0377889	0.102919	0.345952	1400	118562	1102	8.99149	4.61725	762	0.204362	219.563	1014.8	16.4		注：***、**、*分别代表1%、5%、10%的显著性水平
四 川	2011	0.13575	0.0893656	0.0248827	0.350908	3500	283268	2485.17	6.29167	1.29167	1209	0.151429	56.1667	835.3	15
贵 州	2011	0.151764	0.0396445	0.0387232	0.354006	2100	157820	747.02	10.7647	3.35294	152	0.104167	32.1765	844.1	15.4
云 南	2011	0.0315417	0.000386605	0.0165542	0.170553	2500	214524	758.5	5.23684	1.55263	222	0.133264	30.3684	888.6	13.7
西 藏	2011	0.158289	0.0841774	0.0860217	0.378726	500	63108	183.14	0.966667	0.116667	7	0.114286	0.391667	286.7	12.7
陕 西	2011	0.07705	0.0288545	0.0313378	0.298755	4100	151986	777	11.9474	2.89474	768	0.166853	74.1579	984.4	13.1
甘 肃	2011	0.0351637	0.00406659	0.0159168	0.273504	2400	123696	102	3.92308	1.17949	234	0.116098	13.359	711.3	13.2
青 海	2011	0.0611251	0.0426341	0.024318	0.340408	1900	64280	102	1.19444	0.277778	31	0.108333	1.33333	639.7	12.5
宁 夏	2011	0.10065	0.00343522	0.0337008	0.262855	1300	24506	161.4	4.54545	1.81818	98	0.110769	33.1818	874.5	12.1
新 疆	2011	0.440219	0.569789	0.394005	0.788557	4300	155150	532	1.15625	0.25	56	0.154622	3.06875	607.6	12.3
北 京	2012	0.252892	0.168493	0.176374	0.469761	1300	21492	6389	117.857	12.5	1963	0.325043	1622.62	2481.7	7.7
天 津	2012	0.167038	0.0952504	0.0736416	0.275483	900	15391	1009	36.3636	3.63636	398	0.191818	922.727	1329	11.3
河 北	2012	0.162542	0.131369	0.0732126	0.297312	5600	163045	272	17.1579	2.68421	451	0.173045	99.3684	722.4	8.7
山 西	2012	0.123905	0.00905226	0.0527903	0.423831	3800	137771	832	30.6667	2.53333	582	0.143325	121.8	786.4	9.2
内蒙古	2012	0.16721	0.0809285	0.107437	0.366605	9500	163763	605	1.41818	0.509091	436	0.146906	9	1185.3	10.7
辽 宁	2012	0.118611	0.0645195	0.0558464	0.287636	5000	105562	857.3	8.4	3.26667	717	0.193896	197	1027.3	8.9
吉 林	2012	0.150868	0.0372341	0.0434643	0.23622	4400	93208	360	4.44444	3	162	0.184848	50.3889	759.6	8.9
黑龙江	2012	0.370983	0.731553	0.504452	0.787583	6000	159063	1093	1.34783	2.02174	246	0.145041	24.4783	589.3	8.7
上 海	2012	0.161734	0.183533	0.229256	0.651209	500	12541	3974	143.103	17.2414	1417	0.344754	2734.48	2482.4	7.5
江 苏	2012	0.160214	0.262601	0.177787	0.513008	2400	154118	662	28.8	5.6	1812	0.238824	574	1966.1	10.2
浙 江	2012	0.156072	0.126721	0.0988479	0.367577	1800	113550	1670	38	8.4	1273	0.248026	368	1539.6	8.1
安 徽	2012	0.153521	0.147263	0.116134	0.476752	3300	165157	239	12	5.15385	836	0.147844	204.615	984.6	11.2
福 建	2012	0.126323	0.125468	0.047718	0.352857	2300	94661	1684.39	19.5833	5.08333	719	0.207918	227.583	1348.7	11.5
江 西	2012	0.268855	0.188672	0.226964	0.352622	2800	150595	219	9.3125	5.5	242	0.144236	64	938.7	11
山 东	2012	0.275689	0.146812	0.134397	0.358403	4300	244586	1903	18	7.53333	2168	0.206954	483.533	963.9	9.7
河 南	2012	0.198927	0.0828592	0.119621	0.35032	4900	249649	1870.98	19.5625	5.0625	1374	0.142555	267.438	975.5	10.1
湖 北	2012	0.191355	0.102539	0.0934873	0.358668	3800	218151	933.5	11.1667	2.94444	1175	0.160619	183.889	926.1	11.2
湖 南	2012	0.448102	0.080207	0.241991	0.613333	3800	234040	708	8.33333	4.42857	489	0.218401	114.952	950.4	11.4
广 东	2012	0.137366	0.033051	0.0458941	0.34976	2800	194943	8535	12.7778	2.55556	2540	0.253143	302.778	1875.7	8.3
广 西	2012	0.125605	0.112521	0.110331	0.286958	3200	107906	1427	4	1.3913	277	0.137391	52.6087	946.2	10.1
海 南	2012	0.149564	0.114818	0.123386	0.383358	700	24265	1871	17.6471	3.52941	96	0.344151	70.5882	747.3	9.4
重 庆	2012	0.265525	0.0381799	0.118255	0.364833	1500	120728	1253	8.99149	4.98177	769	0.218092	235.237	990.1	13.6
四 川	2012	0.144667	0.0937809	0.0307553	0.352089	3500	293499	2644.69	6.29167	1.3125	1398	0.160957	68.8125	965.3	11.7
贵 州	2012	0.158227	0.0406321	0.0506476	0.356603	2100	164542	890.99	10.7647	3.58824	184	0.110802	46.9412	896.1	13
云 南	2012	0.0340885	0.000699353	0.0157796	0.176572	2600	219052	848.7	5.23684	1.60526	296	0.152437	39.6316	931.4	12
西 藏	2012	0.164172	0.0881279	0.0915675	0.414303	500	65198	221.7	0.966667	0.133333	14	0.110909	0.541667	325.1	11.8
陕 西	2012	0.0823858	0.0293357	0.0405689	0.337576	4100	161411	797	11.9474	3.10526	852	0.16314	92.3158	1123	12.2
甘 肃	2012	0.0374084	0.00406659	0.022453	0.276307	2500	131201	117	3.92308	1.20513	306	0.129707	17.3333	870.9	11.8
青 海	2012	0.0631924	0.0483204	0.0327639	0.348757	1900	65988	138	1.19444	0.277778	29	0.127273	1.52778	675.2	11.2
宁 夏	2012	0.111971	0.0038231	0.0383954	0.27678	1300	26522	187.9	4.54545	2.12121	94	0.134667	35.7576	934.8	10.5
新 疆	2012	0.462122	0.632446	0.366462	0.685783	4700	165909	663	1.16875	0.26875	75	0.164957	3.2875	680.8	11
北 京	2013	0.283791	0.20519	0.177662	0.318226	1300	21673	6988	135.714	13.0952	1822	0.316994	1482.14	2133.3	7.7
天 津	2013	0.184187	0.112702	0.0680963	0.170054	1000	15718	1186	49.0909	3.63636	423	0.167444	992.727	839.3	10.1
河 北	2013	0.16862	0.167412	0.0632234	0.167576	6300	174492	300.8	23.2105	2.68421	467	0.151392	108.842	375	8.2
山 西	2013	0.131152	0.0107298	0.0463267	0.252857	3800	139434	974	42.7333	2.6	568	0.113311	132.467	350.6	9
内蒙古	2013	0.17405	0.0963061	0.105234	0.253152	10200	167515	701	2	0.509091	427	0.129626	9.65455	645.7	8.7
辽 宁	2013	0.121151	0.0776624	0.0579781	0.203034	5100	110973	915	13.7333	3.26667	715	0.180225	219.333	646.7	8.7
吉 林	2013	0.157063	0.0412487	0.0414153	0.175571	4400	94191	415	6.83333	3.33333	162	0.190599	51.3889	480.8	8.5
黑龙江	2013	0.378278	0.781265	0.549747	0.595162	6000	160206	1246	1.8913	2.15217	210	0.144375	25.9783	405.7	7.6
上 海	2013	0.170559	0.226219	0.28487	0.40513	500	12633	4173	160.345	17.2414	1638	0.375728	2918.97	1822.1	7.9
江 苏	2013	0.175499	0.29807	0.185344	0.319761	2600	156094	728	39.7	6.2	2402	0.203061	868.1	1141.9	9.7
浙 江	2013	0.165798	0.144577	0.109308	0.162206	2000	115426	1915	49	8.6	1506	0.214239	421.6	880.5	8.3
安 徽	2013	0.17138	0.171424	0.123795	0.270201	3500	173763	264	17.6923	5.23077	1032	0.125917	264.923	306.4	10.3
福 建	2013	0.148956	0.145027	0.0438391	0.182561	2700	99535	1857.21	24.1667	5.66667	797	0.198755	281.917	658.5	11
江 西	2013	0.289794	0.223964	0.249468	0.193358	3100	152067	681.1	14.0625	5.8125	241	0.130593	71.875	379.4	10.1
山 东	2013	0.287765	0.17844	0.135133	0.193918	4300	252786	2355	24.6	8.4	2430	0.196483	580.2	430	9.4
河 南	2013	0.20532	0.0963198	0.164251	0.194331	4900	249831	2200	30.125	5.125	1374	0.132959	301.438	439.9	9
湖 北	2013	0.196422	0.124032	0.098174	0.205894	3900	226912	936.73	14.3889	3.16667	1861	0.145968	281.167	417.3	10.2
湖 南	2013	0.479665	0.0863754	0.265255	0.318315	4000	235392	757	14.2381	4.66667	587	0.199774	162.857	458.5	10.1
广 东	2013	0.1538	0.0385073	0.0423422	0.170673	3500	202915	8997	14.5556	2.61111	2883	0.23965	377.222	871.6	8.5
广 西	2013	0.137902	0.12652	0.113835	0.174154	4000	111384	1571	5.04348	1.52174	303	0.121451	57.4348	341.1	10
海 南	2013	0.1648	0.12743	0.137174	0.225657	700	24852	2200	20.5882	3.82353	84	0.356073	70.5882	360.9	9.6
重 庆	2013	0.297933	0.0483964	0.126315	0.193652	1700	122846	1461.43	13.3657	4.98177	1015	0.200859	286.513	481.5	12.3
四 川	2013	0.15759	0.101416	0.0385292	0.186778	3500	301816	3410	8.47917	1.52083	1611	0.146391	79.9583	419	10
贵 州	2013	0.165861	0.0454509	0.0538013	0.193268	2100	172564	1125.46	12.6471	3.70588	304	0.106308	69.2941	347.7	12.4
云 南	2013	0.039011	0.00133628	0.0116677	0.103237	2600	222940	1000	6.73684	1.63158	360	0.148525	47.7105	373.7	12.2
西 藏	2013	0.172381	0.106647	0.0955334	0.209758	500	70591	275.89	1.13333	0.141667	13	0.0993133	0.533333	70.5	12.1
陕 西	2013	0.108188	0.0348078	0.0419631	0.167693	4400	165249	849	17	3.31579	958	0.148487	119	463.6	10.5
甘 肃	2013	0.0407226	0.00596974	0.0187618	0.196838	2600	133597	771	5.48718	1.25641	346	0.126168	20.7692	305	11.3
青 海	2013	0.0648972	0.0618703	0.0246618	0.220378	1900	70117	167	1.58333	0.319444	37	0.115301	1.95833	413.8	10.8
宁 夏	2013	0.115859	0.00528335	0.0292991	0.1861	1300	28554	204.2	7.27273	2.42424	90	0.111091	38.7879	513.6	9.8
新 疆	2013	0.451204	0.661622	0.384326	0.743129	4700	170155	706	1.5125	0.29375	77	0.138443	3.83125	373.4	11
北 京	2014	0.284082	0.236644	0.182947	0.34985	1284.75	21849	6752	145.833	13.0952	1873	0.29279	1677.38	2333.7	7.4
天 津	2014	0.187452	0.119307	0.0625304	0.180203	970.927	16110	1382	60	3.63636	400	0.165864	1051.82	998.5	7.5
河 北	2014	0.190751	0.177508	0.0552068	0.182033	6252.77	179200	338	24.4737	2.84211	467	0.131003	121.842	443.4	6.5
山 西	2014	0.135252	0.011792	0.0411311	0.261294	4979.52	140436	990	44.9333	2.8	506	0.0977657	139.6	481.6	4.9
内蒙古	2014	0.187862	0.0980361	0.100859	0.279142	10226	172167	742	2.19091	0.536364	387	0.120681	10.9091	692.3	7.8
辽 宁	2014	0.125625	0.0798261	0.0465282	0.219584	5129.57	115430	1213	14.3333	3.26667	637	0.179511	221	794.8	5.7
吉 林	2014	0.166637	0.0417501	0.0398846	0.17805	4520.49	96041	461	7.22222	3.38889	162	0.156598	55.0556	580.9	6.3
黑龙江	2014	0.375042	0.84589	0.621544	0.687052	6019.33	162464	1472	2.06522	2.15217	176	0.145098	26.8261	460.1	5.3
上 海	2014	0.176369	0.251323	0.26299	0.417136	465.01	12945	4522	182.759	17.2414	1892	0.341359	3498.28	2149.6	7.1
江 苏	2014	0.194531	0.314363	0.195223	0.329997	2677.95	157521	809	43.2	7	2122	0.20328	814.7	1204.6	8.6
浙 江	2014	0.167345	0.157339	0.116361	0.168785	2347.16	116367	2169	54	8.7	1544	0.219974	469.5	927.2	7.7
安 徽	2014	0.18047	0.187893	0.131788	0.280202	3548.44	174373	270	19.6154	5.61538	1097	0.122194	304.385	350.7	9.2
福 建	2014	0.169955	0.158552	0.0458669	0.20967	2759.13	101190	2045.9	27.1667	6.08333	864	0.189332	344.833	714.4	9.9
江 西	2014	0.315225	0.244648	0.24058	0.219878	3702.27	155515	930	16.3125	6.1875	236	0.131978	87	479.3	9.7
山 东	2014	0.30181	0.189621	0.137525	0.2115	5028.92	259515	2596	26.1333	9.26667	2268	0.194692	586.2	537.9	8.5
河 南	2014	0.216608	0.103612	0.167391	0.212119	5199.76	249857	2448	31.5625	5.5	1311	0.130709	356.875	501.5	8.9
湖 北	2014	0.208005	0.130557	0.101405	0.2556	4059.31	236933	1031.3	15.8333	3.33333	1883	0.142892	306.056	487.6	9.7
湖 南	2014	0.520679	0.0922234	0.273137	0.356635	4550.47	236250	870	15.5714	4.80952	598	0.202877	175.619	639	9.5
广 东	2014	0.172778	0.0419557	0.0430793	0.173063	4026.98	212094	9771	16.2222	2.66667	2914	0.243026	418.611	1015.5	7.8
广 西	2014	0.147067	0.13628	0.118951	0.170172	4741.53	114900	1803	5.95652	1.56522	305	0.119935	67.0435	383.2	8.3
海 南	2014	0.17705	0.132513	0.15182	0.245334	693.734	26002	2448	22.0588	4.11765	62	0.37581	65.8824	367.4	8.6
重 庆	2014	0.317358	0.0532058	0.125909	0.213771	1781.24	127392	1657.25	14.3378	5.10328	1120	0.206098	344.593	576.2	10.9
四 川	2014	0.17619	0.106081	0.0430627	0.211174	3976.01	309742	3751.8	9.0625	1.6875	1547	0.152934	87.0625	517.2	8.5
贵 州	2014	0.17595	0.0475381	0.0497697	0.190527	2373.1	179079	1420.68	13.8824	3.76471	385	0.100657	86.0588	462.4	10.8
云 南	2014	0.0437457	0.00172072	0.0155137	0.106984	2915.91	230398	1104.1	7.28947	1.65789	361	0.135444	51.7632	446.4	8.1
西 藏	2014	0.181387	0.118419	0.0970435	0.216957	786.345	75470	315.14	1.26667	0.141667	10	0.110752	0.633333	109.2	10.8
陕 西	2014	0.119602	0.0365094	0.0427966	0.166809	4524.12	167145	1020	18	3.78947	968	0.146129	133.789	506	9.6
甘 肃	2014	0.0518157	0.00675096	0.0178231	0.239111	3403.43	138084	866	5.74359	1.30769	339	0.12877	23.359	348	9
青 海	2014	0.067467	0.0653652	0.0221698	0.217105	2124.6	72703	410	1.76389	0.333333	40	0.112099	2.08333	589.1	9.2
宁 夏	2014	0.120803	0.00562575	0.0236419	0.191971	1289.47	31276	245.6	8.48485	2.42424	79	0.104615	41.9697	538.5	8
新 疆	2014	0.466512	0.666771	0.316264	0.816404	5462.83	175468	727	1.63125	0.29375	81	0.1213	4.8	413.3	10
北 京	2015	0.306406	0.239265	0.184682	0.382152	1284.75	21885	7172	147.619	13.0952	1408	0.347078	1168.45	2592.1	6.9
天 津	2015	0.201022	0.121282	0.0639331	0.21451	1043.74	16550	1503	60.9091	3.63636	378	0.166804	1073.64	1120	6.9
河 北	2015	0.196526	0.178759	0.0497654	0.18932	6958.11	184553	358	24.4737	2.94737	440	0.137954	125.737	553.7	6.8
山 西	2015	0.145546	0.0124744	0.0389066	0.300793	5085.78	140960	1088.8	44.9333	2.86667	469	0.0889919	136.933	544.3	3
内蒙古	2015	0.207162	0.0992871	0.0949384	0.280088	12094.2	175374	852	2.19091	0.572727	377	0.115643	11.6727	828.2	7.7
辽 宁	2015	0.136954	0.0820713	0.0548886	0.228965	5773.39	120365	1354.15	14.3333	3.33333	533	0.185155	203.333	856	2.8
吉 林	2015	0.175946	0.0434445	0.0423429	0.190557	5052.66	97326	536	7.27778	3.5	184	0.173191	66.1667	616.7	6.1
黑龙江	2015	0.392615	0.850862	0.602212	0.752303	6233.76	163233	1682	2.08696	2.23913	152	0.156217	26	500.5	5.4
上 海	2015	0.180954	0.268065	0.262809	0.435455	465.089	13195	5000	184.483	17.2414	1770	0.357055	3348.28	2372.8	7
江 苏	2015	0.208312	0.317393	0.203391	0.380676	2723.84	158805	882	43.8	7.8	2065	0.206878	829	1266.7	8.6
浙 江	2015	0.187946	0.166222	0.124185	0.184036	2563.65	118015	2364	54.4	8.8	1554	0.223056	523.8	1093	8
安 徽	2015	0.2045	0.198236	0.14513	0.300557	4168.81	186940	297	19.6923	6.07692	1183	0.121529	331.692	412.4	8.7
福 建	2015	0.177696	0.163423	0.0538807	0.227665	3200.81	104585	2385.01	27.5	6.58333	921	0.198107	403.917	803.4	8.9
江 西	2015	0.346	0.262162	0.234036	0.246073	4009.74	156625	985	16.375	6.4375	294	0.136403	114	552.3	9.1
山 东	2015	0.306292	0.194312	0.143238	0.229848	5434.45	263447	3184	26.1333	10.2	2122	0.201152	580.333	640.7	7.8
河 南	2015	0.227279	0.109145	0.154348	0.224568	5296.17	250584	2516	31.5625	5.75	1324	0.127753	406.938	573.7	8.4
湖 北	2015	0.21058	0.140661	0.11081	0.279701	4062.28	252980	1082.13	15.9444	3.61111	1667	0.146922	285.5	551.8	8.6
湖 南	2015	0.533252	0.0946288	0.274339	0.394423	4539.57	236886	935	15.6667	5.33333	707	0.206911	191.81	740.7	8.5
广 东	2015	0.181817	0.0420811	0.0474121	0.190114	4035.21	216023	10054	16.3333	2.77778	2893	0.244974	432.611	1139.6	8
广 西	2015	0.176692	0.13628	0.126769	0.171234	5117.19	117993	1885	6	1.56522	318	0.12712	76.1739	449	7.9
海 南	2015	0.197031	0.137423	0.169651	0.268785	1033.42	26860	2516	22.0588	4.11765	53	0.40263	57.0588	387	7.8
重 庆	2015	0.339607	0.0571752	0.125713	0.230144	1922.79	140551	1882.23	14.4593	5.34629	1273	0.218184	387.12	653.7	11
四 川	2015	0.192255	0.115082	0.0451792	0.223593	4442.19	315582	4204	9.08333	1.89583	1510	0.157768	88.4375	584.7	7.9
贵 州	2015	0.182979	0.0490954	0.0561297	0.219848	2810.11	186407	1563.28	13.9412	4.23529	385	0.102902	97.1176	506.5	10.7
云 南	2015	0.0470643	0.00172072	0.0172055	0.118518	2929.36	236007	1210.32	7.31579	1.73684	380	0.150209	52.9474	533.8	8.7
西 藏	2015	0.187161	0.121381	0.099662	0.226604	786.345	78348	363.06	1.26667	0.141667	9	0.115747	0.633333	144.3	11
陕 西	2015	0.130815	0.0379528	0.0453818	0.188786	4549.17	170069	1125	18	3.94737	1022	0.139438	150.105	576.7	7.7
甘 肃	2015	0.0551043	0.00675096	0.0141121	0.234834	3847.23	140052	1061	5.74359	1.38462	340	0.135033	26.1795	438.5	8.2
青 海	2015	0.0693021	0.0653652	0.0206199	0.238964	2349.5	75593	434	1.76389	0.333333	43	0.100806	2.68056	594.6	8.2
宁 夏	2015	0.124318	0.00589635	0.0261394	0.194243	1289.47	33240	266.5	8.48485	2.42424	80	0.100129	41.6667	612.6	8
新 疆	2015	0.488819	0.666771	0.319511	0.7454	5867.64	178263	763	1.64375	0.30625	93	0.126319	5.4375	445	8.8
北 京	2016	0.315857	0.239265	0.187295	0.392477	1264.3	22026	7872	147.619	13.0952	1324	0.377875	1144.64	2351.4	6.9
天 津	2016	0.207336	0.123257	0.065551	0.21448	1060.9	16764	1645	60.9091	3.63636	388	0.17144	1077.27	1173	6
河 北	2016	0.206527	0.178759	0.0493769	0.196546	6956	188431	474	24.4737	3.05263	423	0.14294	132.526	555.6	6.7
山 西	2016	0.161241	0.012645	0.038475	0.303508	5293.4	142066	1245.4	44.9333	2.86667	450	0.0902285	138.867	546.8	4.1
内蒙古	2016	0.206786	0.101789	0.0735822	0.303364	12338.8	196061	956	2.19091	0.581818	369	0.115512	12.1545	851.4	7
辽 宁	2016	0.14145	0.0841563	0.0549855	0.242976	5558.9	120613	1445	14.3333	3.46667	387	0.160435	165	980.9	0.5
吉 林	2016	0.184394	0.0434445	0.0404778	0.195071	5052.7	102484	582	7.27778	3.61111	226	0.156654	95.6667	656.2	6.5
黑龙江	2016	0.406542	0.850862	0.593777	0.830003	6233.8	164502	1895	2.08696	2.23913	145	0.151403	27.7174	535.8	4.4
上 海	2016	0.186502	0.279612	0.267107	0.44404	465.1	13292	5381	184.483	17.2414	1672	0.388827	3231.03	2638.2	6.9
江 苏	2016	0.218844	0.32331	0.208824	0.412004	2767.4	157304	1025	43.9	8.4	2030	0.215046	857.1	1311.8	7.8
浙 江	2016	0.196888	0.173439	0.132031	0.213919	2576.9	119053	2628	54.5	9.1	1526	0.22923	563.9	1209.2	7.5
安 徽	2016	0.213058	0.204491	0.155701	0.287784	4242.6	197588	341	19.6923	6.46154	1214	0.129889	358.308	511.7	8.8
福 建	2016	0.182965	0.165769	0.0605813	0.222857	3201	106757	2587.34	27.5	6.91667	957	0.2012	466.167	770.1	8.4
江 西	2016	0.373879	0.265915	0.233558	0.263654	4010.5	161909	1050	16.375	6.5625	346	0.13641	145.688	538	9
山 东	2016	0.344595	0.196658	0.156536	0.217872	5452.3	265720	3907	26.1333	10.4	2057	0.210736	578.467	708.3	7.4
河 南	2016	0.23535	0.113315	0.152657	0.232798	5570.8	267441	3189	31.5625	5.875	1416	0.122019	491.688	537.1	8.2
湖 北	2016	0.21931	0.144236	0.118515	0.328227	4138.2	260179	1164.73	15.9444	3.83333	1630	0.149065	282.278	589.7	8.1
湖 南	2016	0.554838	0.0967137	0.283363	0.395426	4719.8	238273	1091	15.6667	5.52381	800	0.203674	222.381	915.2	8
广 东	2016	0.190672	0.0430223	0.050777	0.182651	4157.9	218085	10566	16.3333	2.88889	2958	0.248002	468.833	1153	7.5
广 西	2016	0.201931	0.141799	0.125936	0.177164	5192.1	120547	2066	6.04348	1.6087	320	0.133221	85.4783	441.7	7
海 南	2016	0.213784	0.139703	0.181043	0.275187	1033.4	28217	3189	22.0588	4.41176	51	0.399958	58.8235	413.1	7.5
重 庆	2016	0.360034	0.0591299	0.129095	0.241707	2102.1	142921	2147	14.4593	5.4678	1412	0.217256	420.413	681.4	10.7
四 川	2016	0.21363	0.117289	0.0559438	0.226248	4622.7	324138	4609	9.08333	2	1538	0.161248	93.5208	625.9	7.8
贵 州	2016	0.188181	0.0490954	0.0628987	0.221824	3269.5	191626	1873.81	13.9412	4.35294	511	0.105745	120.235	519.5	10.5
云 南	2016	0.0513289	0.00187709	0.0183414	0.115392	3651.5	238052	1183.08	7.31579	1.73684	493	0.149634	58.7895	540.5	8.7
西 藏	2016	0.18517	0.124344	0.109153	0.257843	786.3	82096	423.9	1.26667	0.15	12	0.118494	0.708333	151.7	10.1
陕 西	2016	0.100996	0.0389151	0.046529	0.199199	4632.6	172471	1002	18	4.10526	1128	0.140673	176.526	686.6	7.5
甘 肃	2016	0.0595426	0.00701158	0.0116569	0.242917	4102.1	143039	149	5.74359	1.4359	358	0.134594	28.6923	485.8	7.6
青 海	2016	0.0726316	0.0682083	0.0226362	0.247165	2349.2	78585	511	1.76389	0.347222	53	0.0920284	3.18056	630	7.8
宁 夏	2016	0.199832	0.00589635	0.0259866	0.21097	1320.1	33940	313.4	8.48485	2.57576	70	0.107063	42.8788	652.4	7.4
新 疆	2016	0.515676	0.666771	0.324207	0.757583	5869	182085	2780	1.64375	0.30625	95	0.125451	5.76875	527.7	7.5
北 京	2017	0.345021	0.239265	0.16638	0.425576	1264.25	22226	8607	147.619	13.0952	1299	0.405103	1116.07	2394.7	6.8
天 津	2017	0.219035	0.125233	0.07003	0.228758	1148.86	16532.1	1863	60.9091	3.63636	351	0.189467	868.182	1337.2	3.4
河 北	2017	0.21968	0.181261	0.0517889	0.238404	7162.02	191693	666.8	24.4737	3.15789	429	0.15465	132.947	606	6.6
山 西	2017	0.17234	0.0136685	0.0376421	0.307492	5316.82	142855	1583.4	44.9333	3	397	0.106264	136.733	634.7	6.8
内蒙古	2017	0.218414	0.104291	0.0664855	0.335073	12674.7	199423	1188	2.19091	0.636364	326	0.120268	11.2273	924.9	4
辽 宁	2017	0.146354	0.0884864	0.0526547	0.235219	5914.66	122705	1559	14.3333	3.6	343	0.151389	152.6	1014.4	4.2
吉 林	2017	0.196702	0.0471159	0.0371747	0.218846	5044.13	103896	699	7.33333	3.83333	223	0.147808	103.389	655.9	5.2
黑龙江	2017	0.416129	0.850862	0.596653	0.939827	6232.25	165989	2211	2.08696	2.43478	101	0.149736	25.3913	584.4	6
上 海	2017	0.193694	0.287118	0.262116	0.466341	465.095	13322	5644	184.483	17.2414	1655	0.402121	3224.14	3008.5	7
江 苏	2017	0.235672	0.338611	0.219545	0.408258	2816.44	158475	1169	43.9	8.8	1853	0.234351	841.1	1399.4	7.2
浙 江	2017	0.200662	0.184987	0.134192	0.222267	2623.97	120101	3040	54.6	9.9	1579	0.246248	579.1	1190.5	7.8
安 徽	2017	0.227969	0.21255	0.173891	0.275719	4274.61	203285	341	19.6923	7.07692	1213	0.130481	375	544	8.6
福 建	2017	0.200964	0.177497	0.069285	0.231559	3191.41	108012	2983.98	27.5833	7.33333	1021	0.229438	505.75	735.2	8.1
江 西	2017	0.413711	0.27217	0.205033	0.247696	4280.46	162285	1415	16.375	7.1875	447	0.13317	180.875	571.5	8.8
山 东	2017	0.352162	0.201349	0.143291	0.216958	5726.4	270590	4794	26.1333	10.7333	1767	0.190532	533.8	656.2	7.3
河 南	2017	0.245624	0.118527	0.138704	0.260262	5414.67	267805	3463	31.5625	6.125	1235	0.123302	461.312	542	7.8
湖 北	2017	0.225878	0.151384	0.13014	0.385986	4215.54	269484	1275.61	15.9444	4.11111	1363	0.163401	247.722	688.8	7.8
湖 南	2017	0.587377	0.0998412	0.297261	0.411414	4744.52	239724	1241	15.6667	5.90476	930	0.207941	246.667	1111	8
广 东	2017	0.207145	0.0462858	0.0560437	0.186191	4200.7	219580	11420	16.3333	3.05556	3143	0.248559	497.444	1207.2	7.5
广 西	2017	0.213256	0.147318	0.141361	0.186751	5191.39	123259	2478	6.04348	1.78261	344	0.139657	99.4783	451.7	7.1
海 南	2017	0.241474	0.141983	0.173965	0.292533	1033.42	30684.3	3463	22.0588	4.70588	52	0.443295	60.5882	455.6	7
重 庆	2017	0.377735	0.0606937	0.11906	0.270173	2166.05	147881	2776.16	14.4593	5.58931	1372	0.202398	423.208	768.2	9.3
四 川	2017	0.236625	0.121704	0.0642594	0.234803	4831.73	329950	4976	9.08333	2.08333	1474	0.143727	90.5417	716.4	8.1
贵 州	2017	0.191213	0.0500831	0.0679325	0.239641	3284.55	194379	2457.65	13.9412	4.58824	598	0.108195	142.118	554.5	10.2
云 南	2017	0.0540858	0.00187709	0.0222789	0.116336	3681.67	242546	1193.02	7.31579	1.78947	536	0.157145	58.9737	584.9	9.5
西 藏	2017	0.195035	0.127307	0.11804	0.254657	785.085	89343.3	390.81	1.26667	0.15	13	0.129591	0.716667	156.9	10
陕 西	2017	0.104667	0.0398774	0.0416508	0.184954	4972.14	174395	1113	18	4.26316	1241	0.142134	194.053	669.8	7.8
甘 肃	2017	0.0649934	0.00727221	0.0102172	0.252622	4663.82	142252	156	5.74359	1.48718	362	0.120249	28	519.5	3.5
青 海	2017	0.0785653	0.0710515	0.0235518	0.244038	2349.49	80895.1	626	1.76389	0.361111	53	0.0879021	3.20833	674.9	7.2
宁 夏	2017	0.210005	0.00613091	0.0275717	0.199465	1352.1	34561.2	431.5	8.48485	2.72727	67	0.110678	41.3636	643.8	7.3
新 疆	2017	0.534476	0.666771	0.33785	0.697081	5946.9	185338	3007	1.64375	0.31875	97	0.129539	6.1375	486.7	7.6
北 京	2018	0.347872	0.256324	0.153858	0.480149	1264.25	22255.8	9123	147.619	13.0952	1259	0.453118	1108.33	2191.6	6.7
天 津	2018	0.226081	0.129407	0.073586	0.232445	1153.43	16256.7	1915	60.9091	4.54545	345	0.179018	797.273	1522.2	3.4
河 北	2018	0.231596	0.196065	0.0549555	0.23218	7361.81	193252	759.8	25.5789	3.21053	442	0.164459	128	620.5	6.5
山 西	2018	0.179855	0.0141803	0.0328455	0.259378	5440.88	143326	1843	49.2	3.13333	442	0.109444	133.067	617.6	6.6
内蒙古	2018	0.235976	0.105734	0.0683925	0.368878	12765.8	202641	1340	2.19091	0.663636	281	0.11413	9.94545	737.8	5.2
辽 宁	2018	0.149999	0.0916139	0.0421157	0.236222	6524.85	122974	1739	14.4	3.66667	304	0.166353	142.933	1101	5.6
吉 林	2018	0.20968	0.0475239	0.0307399	0.215425	5042.99	105399	777	7.33333	4	174	0.131754	85.0556	675.3	4.4
黑龙江	2018	0.426545	0.850862	0.603995	0.873101	6894.45	167116	2445	2.08696	2.45652	80	0.135079	24.1957	602.8	4.5
上 海	2018	0.204134	0.295201	0.263014	0.375131	466.073	13106.4	5921	184.483	17.2414	1626	0.395669	3317.24	2786.3	6.8
江 苏	2018	0.253233	0.348853	0.222287	0.424305	3061.77	158729	1272	44.1	9.2	1848	0.231721	858.5	1100.2	6.7
浙 江	2018	0.204784	0.187539	0.138614	0.221264	2813.47	120662	3375	56.2	10.2	1659	0.240818	580.8	1258.9	7.1
安 徽	2018	0.248218	0.223969	0.18806	0.286368	4324.21	208826	343	20.0769	7.15385	1252	0.13363	384.615	552.6	8
福 建	2018	0.212354	0.183538	0.0754265	0.248875	3513.74	108901	3329.82	29.9167	7.58333	1092	0.248914	534.167	767.3	8.3
江 西	2018	0.416623	0.277076	0.179181	0.260292	4278.44	161941	1734	17.25	7.375	540	0.130821	195.875	632.2	8.7
山 东	2018	0.368815	0.206129	0.109705	0.206751	6335.89	275642	4500	26.5333	10.9333	1609	0.155505	493.6	718.9	6.3
河 南	2018	0.25439	0.125021	0.144821	0.261029	5409.66	268589	3911	32	6.3125	983	0.096677	375.75	511.4	7.6
湖 北	2018	0.236099	0.154544	0.13593	0.39047	4340.55	275039	1382	16.3889	4.38889	1479	0.153988	272.444	691.4	7.8
湖 南	2018	0.64615	0.101364	0.309759	0.379792	5070.1	240060	1403	16.1429	6	1101	0.185859	280.143	1130.2	7.8
广 东	2018	0.218952	0.048793	0.0557759	0.205601	4524.17	217699	12931	16.5	3.11111	3491	0.243068	456.889	1114	6.8
广 西	2018	0.231937	0.147318	0.153435	0.201737	5202.24	125449	2766	6.91304	1.78261	362	0.134331	104.435	523.5	6.8
海 南	2018	0.261781	0.141983	0.158471	0.271944	1033.42	35022.7	3911	22.0588	4.70588	55	0.477344	60.5882	530.4	5.8
重 庆	2018	0.397796	0.0626483	0.12531	0.253979	2326.44	157483	3046.76	14.4593	5.58931	1224	0.193275	389.186	764.4	6
四 川	2018	0.254853	0.125186	0.0638525	0.205511	4950.22	331592	5484.3	9.08333	2.1875	1544	0.150219	91.3542	663.5	8
贵 州	2018	0.203708	0.0517163	0.0690453	0.226426	3564.7	196908	2799.51	14	4.76471	611	0.104261	144.176	477.2	9.1
云 南	2018	0.0617795	0.00205749	0.0211266	0.122679	3847.89	252929	1348.16	7.36842	1.86842	611	0.1478	60.8158	552.1	8.9
西 藏	2018	0.199746	0.13027	0.123627	0.266663	785.085	97785	475.32	1.275	0.158333	10	0.126761	0.75	200.4	8.9
陕 西	2018	0.105692	0.0405804	0.0360016	0.200528	5001.53	177128	1190	18	4.42105	1282	0.145359	212.211	704.5	8.1
甘 肃	2018	0.0689109	0.00727221	0.0093807	0.225572	4671.74	143228	168	5.82051	1.51282	348	0.107649	24.1282	520.3	6.1
青 海	2018	0.0808685	0.0710515	0.0262164	0.273861	2349.05	82137.1	715	1.76389	0.361111	48	0.0862745	3.29167	585.2	7.1
宁 夏	2018	0.225197	0.00624819	0.0305363	0.203065	1373.05	35405.2	458.8	8.48485	2.72727	62	0.119403	40.4545	754.9	6.8
新 疆	2018	0.555158	0.701096	0.397962	0.717288	5959.39	189050	3368	1.64375	0.325	94	0.138545	5.98125	528.9	6.1
北 京	2019	0.36114	0.2904	0.165863	0.505163	1366.96	22365.9	9241	159.524	13.0952	2076	0.364328	1489.29	2272.1	6.1
天 津	2019	0.235269	0.134189	0.0780821	0.244009	1185.27	16131.9	2069	72.7273	4.54545	483	0.148284	922.727	1579	4.8
河 北	2019	0.247188	0.218463	0.0593449	0.24395	7791.29	196983	790.3	26.8947	3.26316	468	0.171	134.368	655.7	6.7
山 西	2019	0.186099	0.0146521	0.0302219	0.260647	5890.41	144283	2037.1	55.6667	3.33333	471	0.115745	137.867	667.5	6.1
内蒙古	2019	0.235712	0.112367	0.0638955	0.354512	13016.4	206089	1443	2.35455	0.663636	239	0.113314	9.87273	742.1	5.2
辽 宁	2019	0.152618	0.0959389	0.0409874	0.224335	6512.13	124767	1711	16.2667	3.73333	340	0.145904	148.4	1056.3	5.4
吉 林	2019	0.212223	0.0490282	0.025724	0.214511	5042.99	106660	830	8.83333	4	166	0.136469	65.6667	663	3
黑龙江	2019	0.434005	0.945315	0.754545	0.901332	6780.95	168710	2509	2.6087	2.45652	87	0.119148	25.587	609.7	4
上 海	2019	0.222165	0.309764	0.264915	0.376223	466.537	13044.6	6121	217.241	17.2414	2231	0.331437	4475.86	2898	6
江 苏	2019	0.26282	0.372066	0.237301	0.454365	3586.8	159937	1364	48.5	9.3	2030	0.200073	882.4	1119.9	5.9
浙 江	2019	0.221259	0.204177	0.144634	0.232917	2842.16	121813	3600	63.6	10.3	1957	0.220076	628.5	1366.8	6.8
安 徽	2019	0.259194	0.235983	0.204088	0.287932	4843.93	218295	360	24.8462	7.30769	1271	0.144097	395.462	606.1	7.3
福 建	2019	0.2527	0.193721	0.0805277	0.227577	3513.76	109785	3618.06	34.0833	7.58333	1272	0.24446	597.333	788.6	7.5
江 西	2019	0.474745	0.287362	0.151335	0.274452	4904.98	209131	1846	20.375	7.4375	635	0.123631	215.375	576	7.9
山 东	2019	0.386778	0.220457	0.122971	0.210232	6633.01	280325	5881	29.6667	11	1377	0.157001	364.8	786.9	5.3
河 南	2019	0.278362	0.130948	0.14402	0.270675	6466.94	269832	3901	36.5625	6.375	1133	0.0969489	416.062	539.2	6.8
湖 北	2019	0.247905	0.164362	0.142152	0.362623	5164.85	289029	1494.37	18.4444	4.38889	1494	0.147139	278.778	734.1	7.3
湖 南	2019	0.68687	0.108573	0.350005	0.40643	5578.81	240566	1542	19.2381	6.04762	1250	0.168335	314.095	1039.8	7.6
广 东	2019	0.22532	0.0533697	0.0572477	0.192357	4719.68	220290	13931	19	3.11111	4393	0.205148	485.833	1216.3	6.2
广 西	2019	0.23326	0.16343	0.131451	0.196339	5206.43	127819	2904	8.21739	1.82609	415	0.127321	112.609	494.6	6
海 南	2019	0.288743	0.150742	0.155271	0.281354	1033.42	38106.8	3901	27.6471	4.70588	71	0.397877	101.471	512.1	5.8
重 庆	2019	0.435251	0.0657118	0.130632	0.244126	2359.07	174284	3505.9	17.497	5.58931	1159	0.192006	396.233	790.3	6.3
四 川	2019	0.270511	0.129086	0.0626734	0.202798	5241.86	337095	6386	10.1458	2.1875	1672	0.143517	96.0625	642.1	7.4
贵 州	2019	0.214854	0.0559653	0.066545	0.220969	3753.19	204723	3030.88	15.3529	4.76471	607	0.102719	140.706	484	8.3
云 南	2019	0.0670868	0.00270623	0.0165804	0.117753	4053	262409	1472.33	8.84211	1.86842	633	0.137081	61.0526	549.6	8.1
西 藏	2019	0.220622	0.137706	0.127681	0.25044	785.085	103951	528.46	1.5	0.158333	13	0.113191	1.025	199.7	8.1
陕 西	2019	0.111995	0.0431679	0.0352176	0.186398	5419.21	180070	1558	20.5789	4.42105	1372	0.136265	230.842	691.5	6
甘 肃	2019	0.073738	0.00783285	0.00916398	0.225779	4829.66	151443	188	6.71795	1.51282	347	0.10531	24.8718	470.4	6.2
青 海	2019	0.0910515	0.075857	0.0305955	0.275661	2449.28	83760.6	813	1.95833	0.361111	58	0.083854	3.91667	605.9	6.1
宁 夏	2019	0.243851	0.00673475	0.0320572	0.189643	1552.94	36575.7	521	10.1515	2.72727	72	0.128774	45	767	6.5
新 疆	2019	0.418951	0.740569	0.348637	0.376786	6935.38	194222	3758	1.8125	0.325	126	0.137437	7.09375	481.4	6.2
北 京	2020	0.324231	0.319233	0.152908	0.265192	1404	22264	5339	173.214	13.0952	2009	0.220189	1529.17	1217.8	1.1
天 津	2020	0.239436	0.137831	0.063638	0.171414	1186	16411	1046	82.7273	4.54545	515	0.0936508	959.091	833.5	1.4
河 北	2020	0.226762	0.221923	0.0608433	0.147608	7941	204737	730.477	28.1579	3.26316	499	0.121161	144.895	467.6	3.8
山 西	2020	0.170457	0.0152159	0.0210286	0.172684	6251	144323	1299	56.8667	3.33333	603	0.0905618	162.667	390.9	3.6
内蒙古	2020	0.213009	0.116404	0.0460539	0.187581	14190	210217	873	2.49091	0.672727	227	0.0890675	9.47273	543.9	0.2
辽 宁	2020	0.142311	0.0989824	0.0264241	0.15227	6627	130899	939	17.6667	3.73333	347	0.0944444	146.467	586.4	0.6
吉 林	2020	0.180449	0.0507524	0.0132909	0.133627	5043	107848	529	9.88889	4	155	0.0969543	64.5556	432.7	2.3
黑龙江	2020	0.332355	0.999998	0.773703	0.454368	6781	168119	1645	3.06522	2.47826	86	0.0828729	28.1522	397.5	0.9
上 海	2020	0.219952	0.31726	0.287914	0.233332	491	12917	3021	236.207	17.2414	2508	0.20462	4875.86	1468.8	1.7
江 苏	2020	0.23277	0.379563	0.230499	0.288023	4174	158101	900	51.1	9.3	2510	0.151101	994.6	679.5	3.7
浙 江	2020	0.235541	0.209057	0.13833	0.167461	3159	123080	2523	66.2	10.3	2163	0.174121	610.6	866.9	3.6
安 徽	2020	0.218274	0.24223	0.188889	0.171532	5287	236483	229	26.5385	7.30769	1359	0.113547	391.308	456.2	3.7
福 建	2020	0.232869	0.199399	0.0838108	0.164629	3779	110118	2326.77	36.25	7.58333	1411	0.175888	606.25	480	3.2
江 西	2020	0.38712	0.291975	0.154129	0.261621	4917	210641	1273	21.9375	7.5	796	0.0984962	241.5	444.6	3.8
山 东	2020	0.311444	0.225414	0.123188	0.121945	6924	286814	3234	31.2667	11	1627	0.117751	386.867	779.4	3.5
河 南	2020	0.253281	0.135273	0.1257	0.103896	6519	270271	1801	37.875	6.4375	1184	0.0810939	440.438	353.9	1.1
湖 北	2020	0.234293	0.168414	0.147603	0.247668	5185	289612	788.404	19.9444	4.38889	1421	0.103426	287.222	422.7	-5.4
湖 南	2020	0.506044	0.112097	0.354368	0.254572	5646	241138	1136	20.3333	6.09524	1493	0.135209	343.667	726.1	3.8
广 东	2020	0.18751	0.0561276	0.05311	0.136988	4871	221873	8878	20.2222	3.11111	4868	0.142224	486.056	779.5	2.3
广 西	2020	0.157909	0.176999	0.105224	0.135956	5206	131642	1808	9.17391	1.82609	531	0.0954944	117.261	352.9	3.7
海 南	2020	0.258985	0.157749	0.14441	0.221532	1033	40163	1801	32.3529	4.70588	98	0.309593	127.647	353.4	3.5
重 庆	2020	0.391619	0.0670934	0.126196	0.174688	2356	180796	2593.28	19.9271	5.58931	1181	0.150187	417.375	635.5	3.9
四 川	2020	0.24516	0.133496	0.0605224	0.145454	5312	394371	4316	10.625	2.1875	1795	0.108267	104.958	478.7	3.8
贵 州	2020	0.213699	0.0577105	0.0597611	0.158168	3873	206693	2253.16	16.8824	4.76471	645	0.0910891	139.118	365.6	4.5
云 南	2020	0.0698959	0.00336719	0.0103203	0.10383	4220	292479	956.5	9.44737	1.86842	770	0.0958495	61.3684	418.7	4
西 藏	2020	0.202873	0.141196	0.121337	0.151827	785	118238	390.96	1.675	0.166667	17	0.0945652	1.29167	158.5	7.8
陕 西	2020	0.114802	0.0456089	0.0308222	0.15634	5589	180660	996	21.7895	4.42105	1419	0.105219	246.684	435.2	2.1
甘 肃	2020	0.0714141	0.00863377	0.0031931	0.142712	5113	155957	144	7.23077	1.5641	368	0.0885645	27.3333	416.5	3.8
青 海	2020	0.0893746	0.0845943	0.0158875	0.160587	2975	85131	675	2.23611	0.361111	56	0.0672131	3.58333	416.3	1.5
宁 夏	2020	0.185698	0.00716724	0.0192413	0.11864	1663	36901	347.7	13.1818	2.72727	59	0.0890411	44.2424	428.9	3.9
新 疆	2020					7831	209220	1894	1.9625	0.325	181	0.0915068	8.73125	296.7	3.4
